# Supplementary material for: A four-step cascade reaction involving O[1,3] sigmatropic shift and Smiles rearrangements as key steps
Source: Royal Society of Chemistry journal article supplement (doi:10.1039/d2nj01393b), 2022-01-01
Supplement: d2nj01393b1.pdf [file d2nj01393b1.pdf]

# **A four-step cascade reaction involving O[1,3] sigmatropic shift and Smiles rearrangements as key steps**

Guangyu Zhang and Jiaxi Xu\*

State Key Laboratory of Chemical Resource Engineering, Department of Organic Chemistry,

College of Chemistry, Beijing University of Chemical Technology, Beijing 100029, China

\*E-mail: jxxu@mail.buct.edu.cn

## **Supplementary Information**

### **Contents**

|                                                                                                                       |     |
|-----------------------------------------------------------------------------------------------------------------------|-----|
| Copies of $^1\text{H}$ and $^{13}\text{C}$ NMR spectra of products <b>1</b> .....                                     | S2  |
| Copies of $^1\text{H}$ , $^{13}\text{C}$ , and $^{19}\text{F}$ NMR spectra of products <b>3</b> .....                 | S10 |
| Copies of $^1\text{H}$ and $^{13}\text{C}$ NMR spectra of products <b>4</b> .....                                     | S36 |
| Copies of $^1\text{H}$ and $^{13}\text{C}$ NMR spectra of products <b>5</b> .....                                     | S37 |
| Copies of $^1\text{H}$ NMR spectra of products <b>3</b> produced from the reactions of <b>5</b> and<br><b>2</b> ..... | S38 |
| Copies of $^1\text{H}$ NMR spectra in tracing reaction mixtures.....                                                  | S39 |

# Copies of $^1\text{H}$ and $^{13}\text{C}$ NMR spectra of products **1**

## *N*-(4-Fluorophenyl)-*N*-hydroxybenzamide (**1a**)

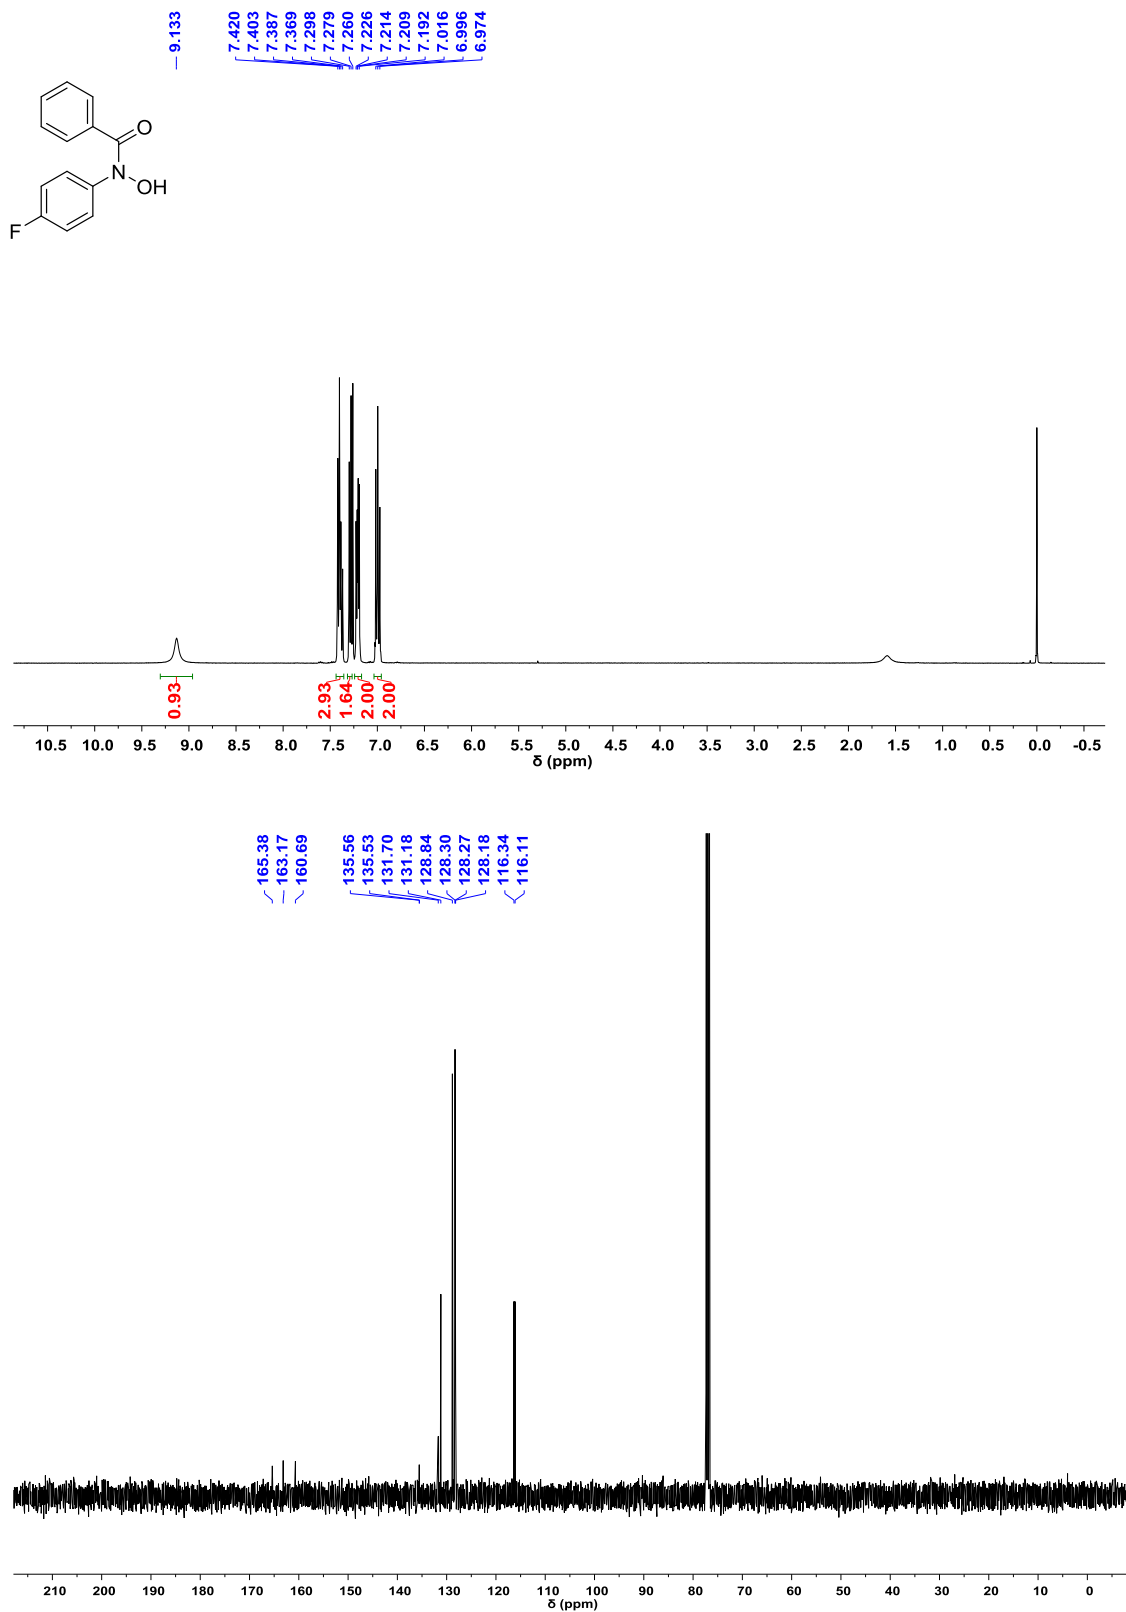

*N*-Hydroxy-*N*-(4-methylphenyl)benzamide (**1b**)

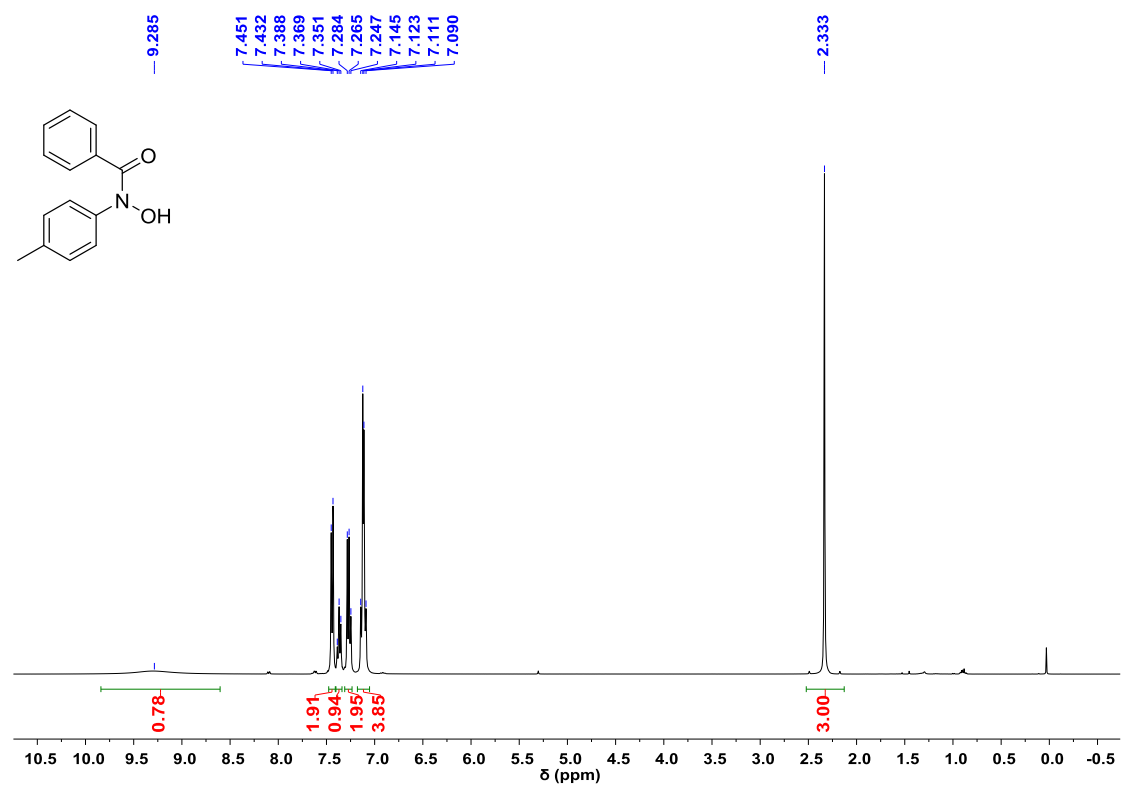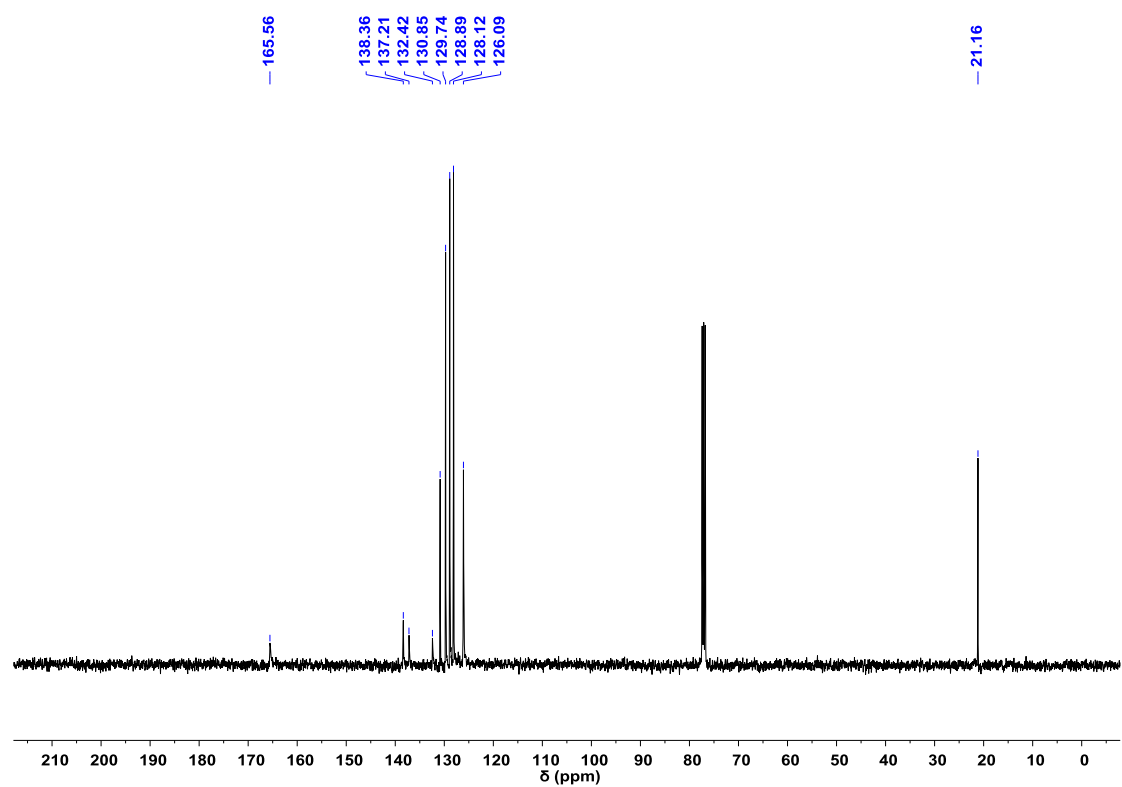

*N*-(4-Chlorophenyl)-*N*-hydroxybenzamide (**1c**)

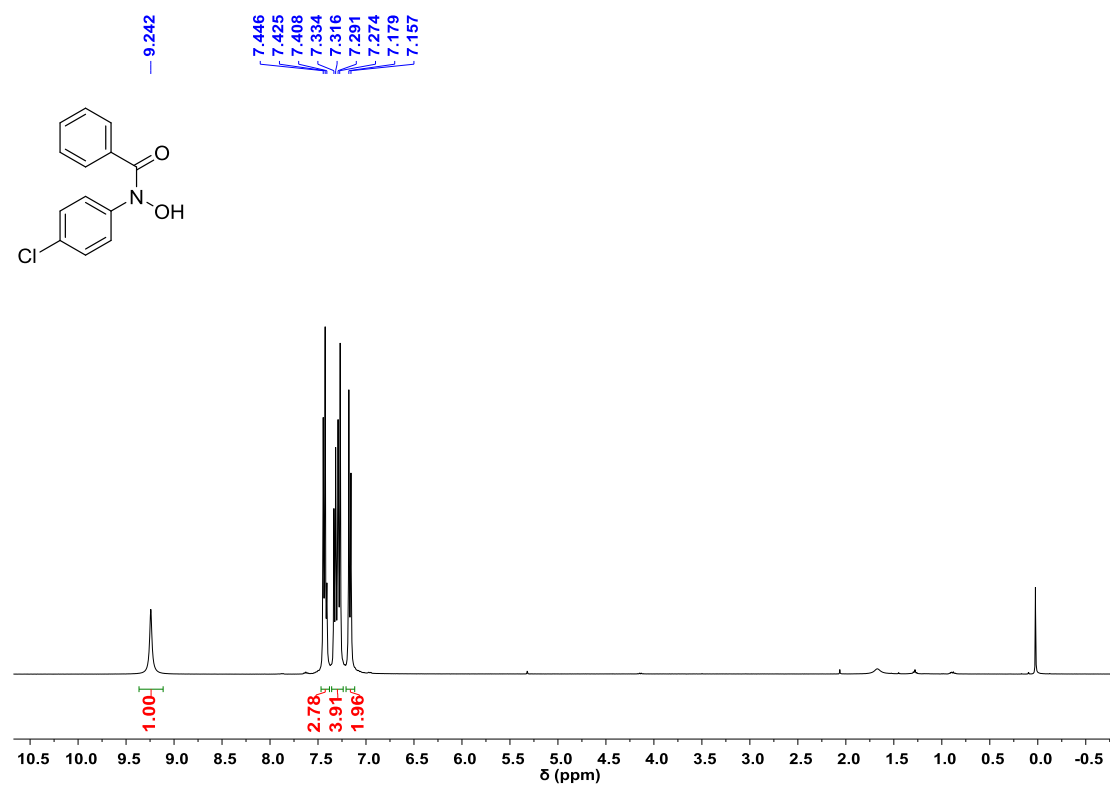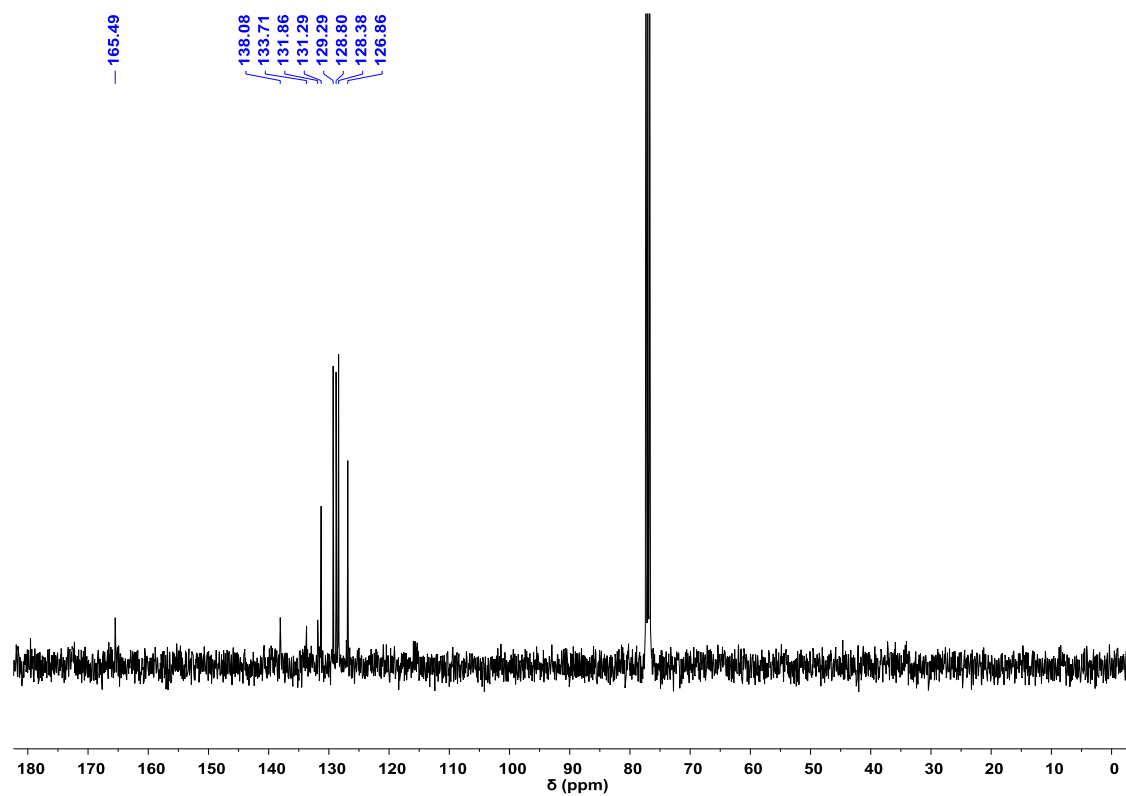

*N*-(4-Bromophenyl)-*N*-hydroxybenzamide (**1d**)

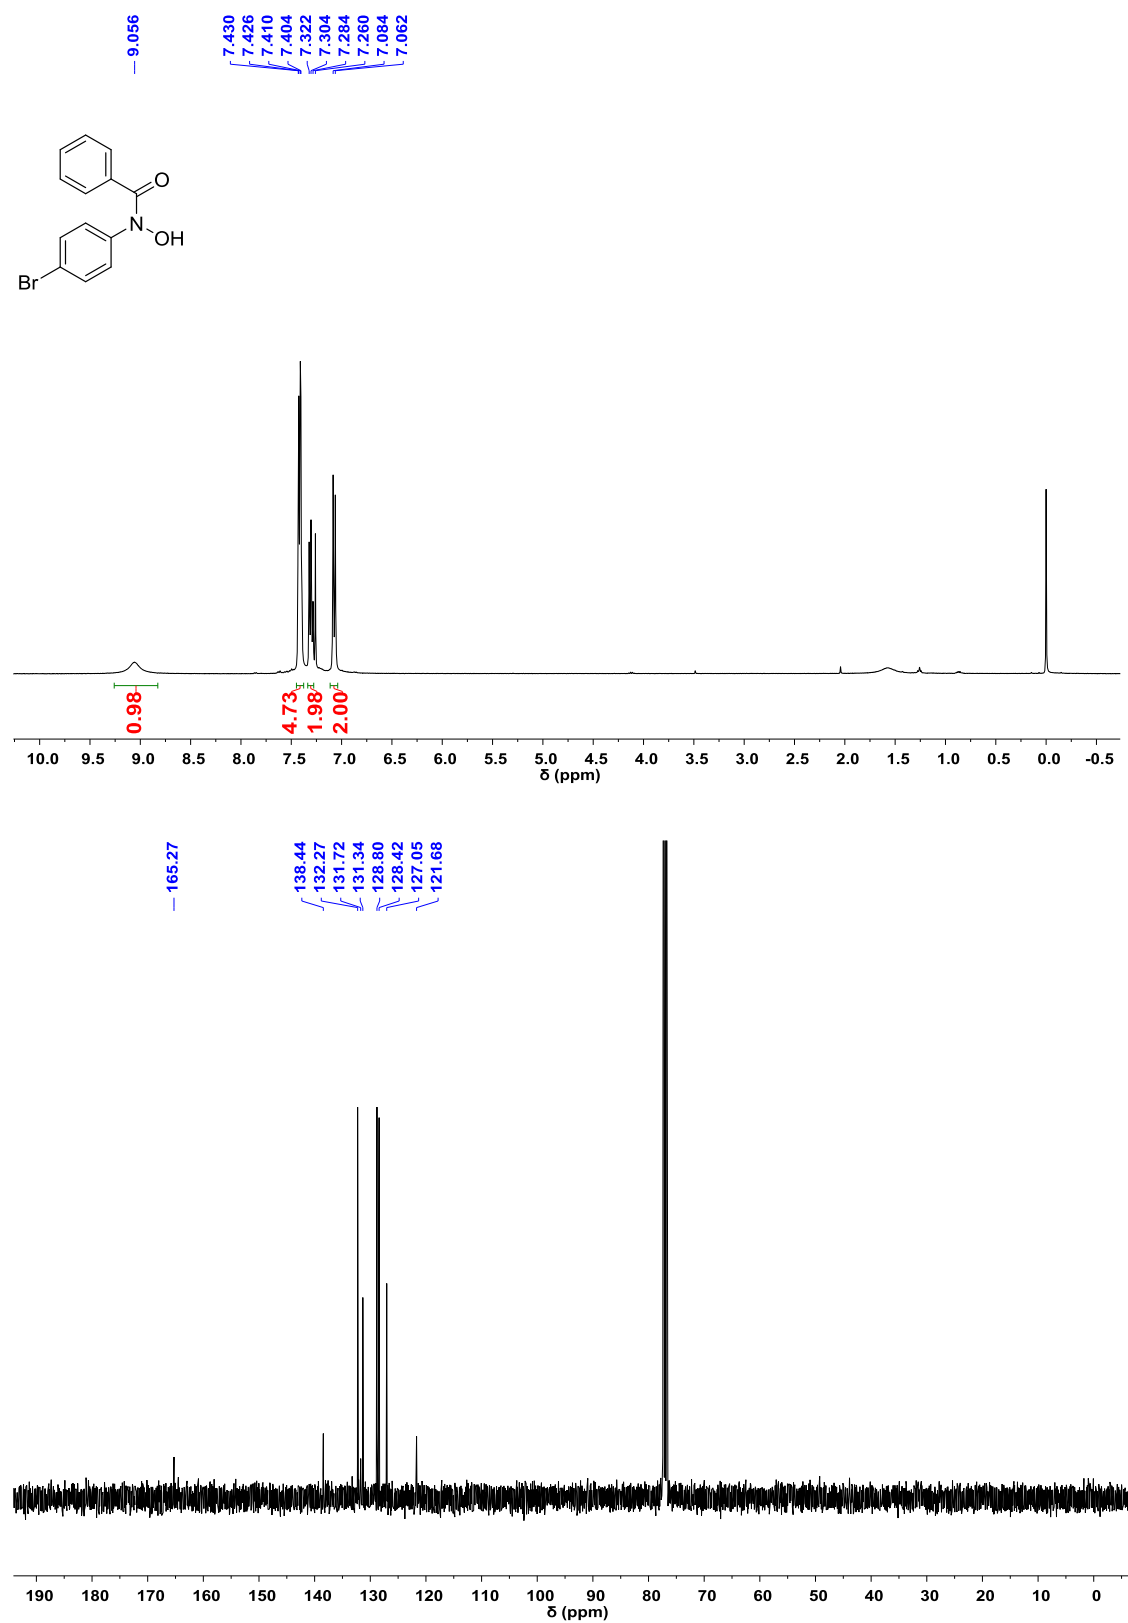

*N*-Hydroxy-*N*-(*p*-tolyl)acetamide (**1e**)

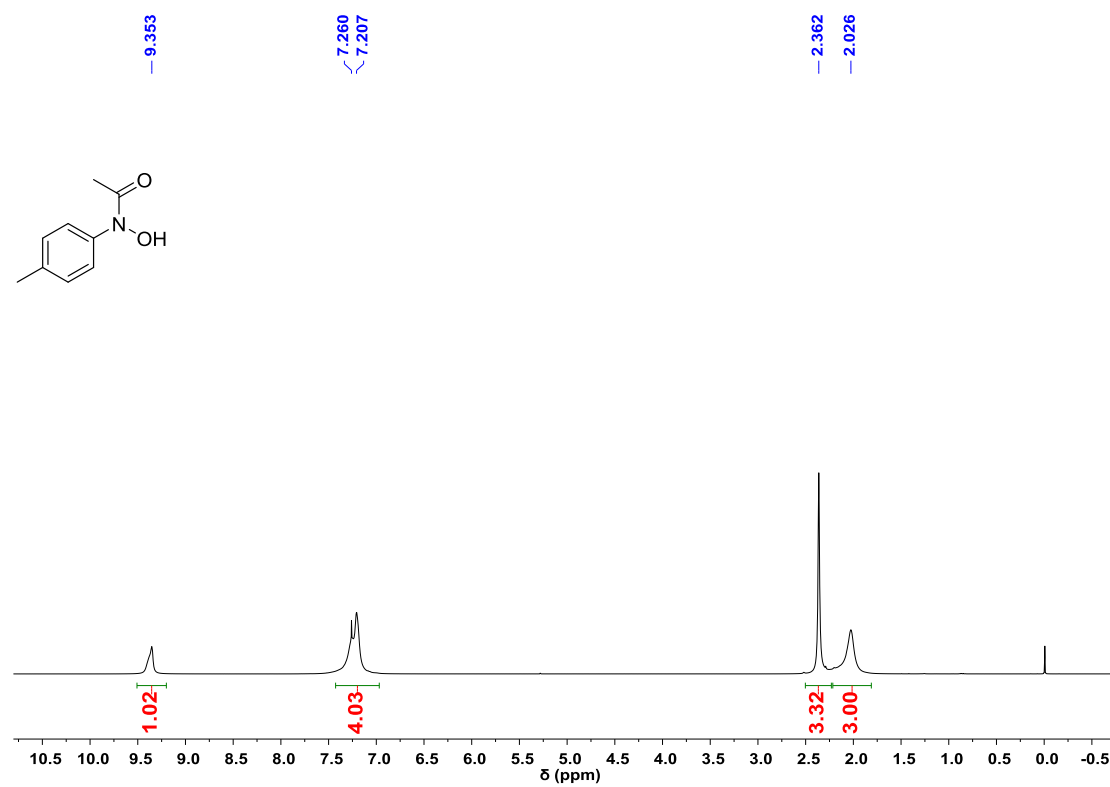

*N*-Hydroxy-4-methyl-*N*-(*p*-tolyl)benzamide (**1f**)

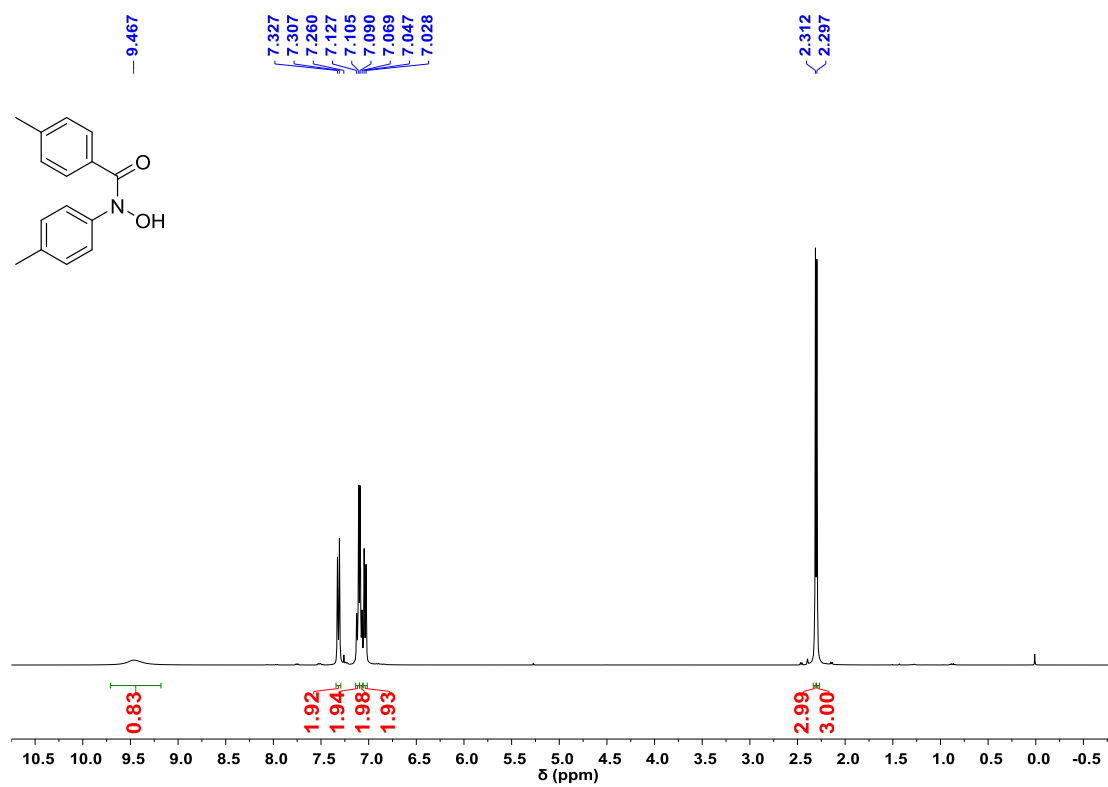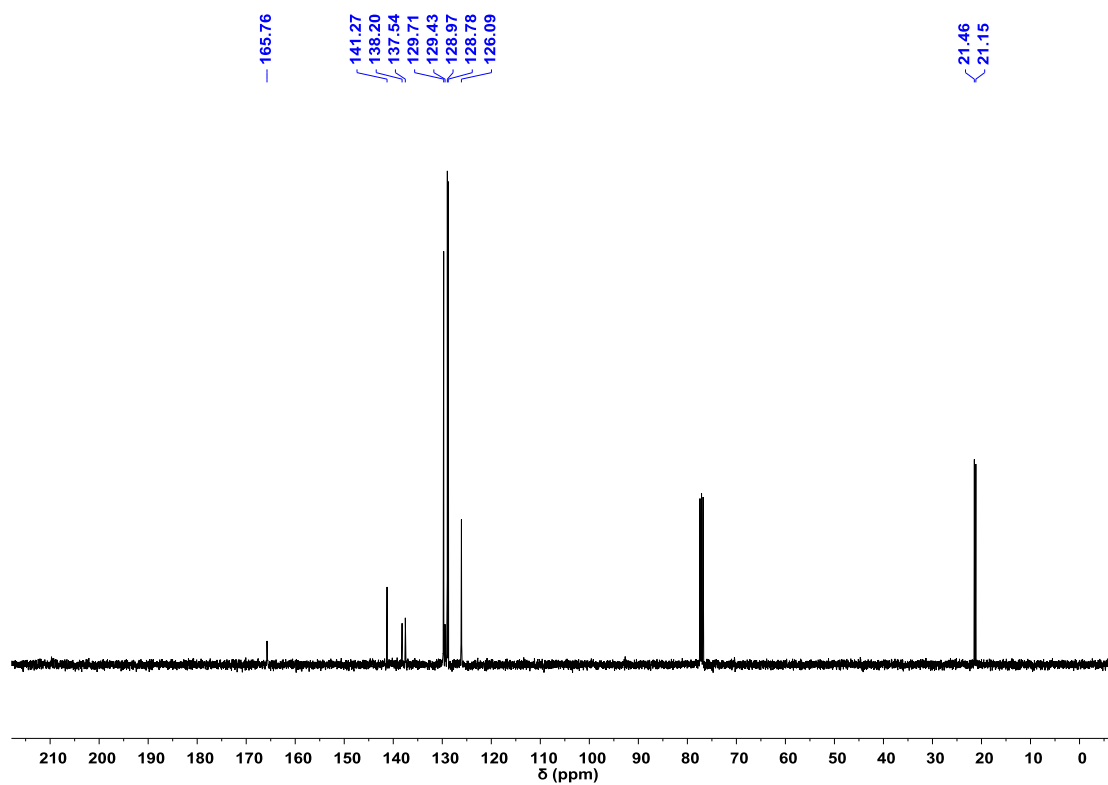

3-Chloro-*N*-(4-chlorophenyl)-*N*-hydroxybenzamide (**1g**)

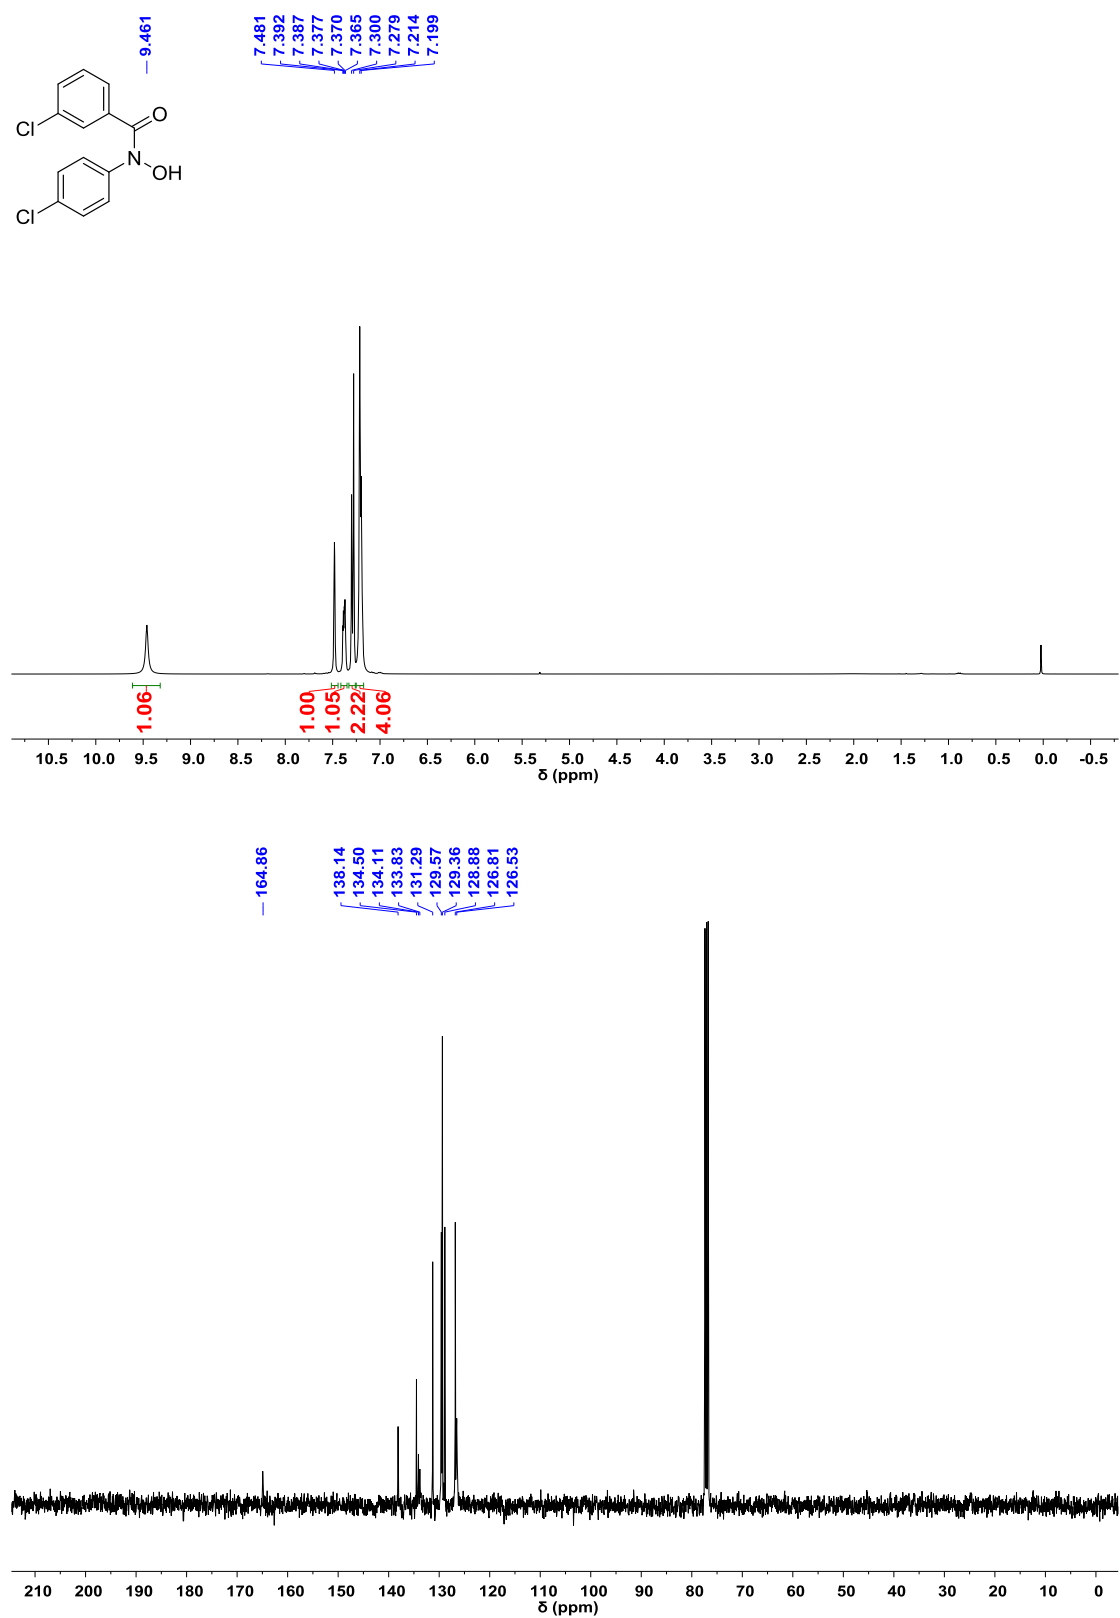



*N*-Hydroxy-4-methoxy-*N*-(*p*-tolyl)benzamide (**1h**)

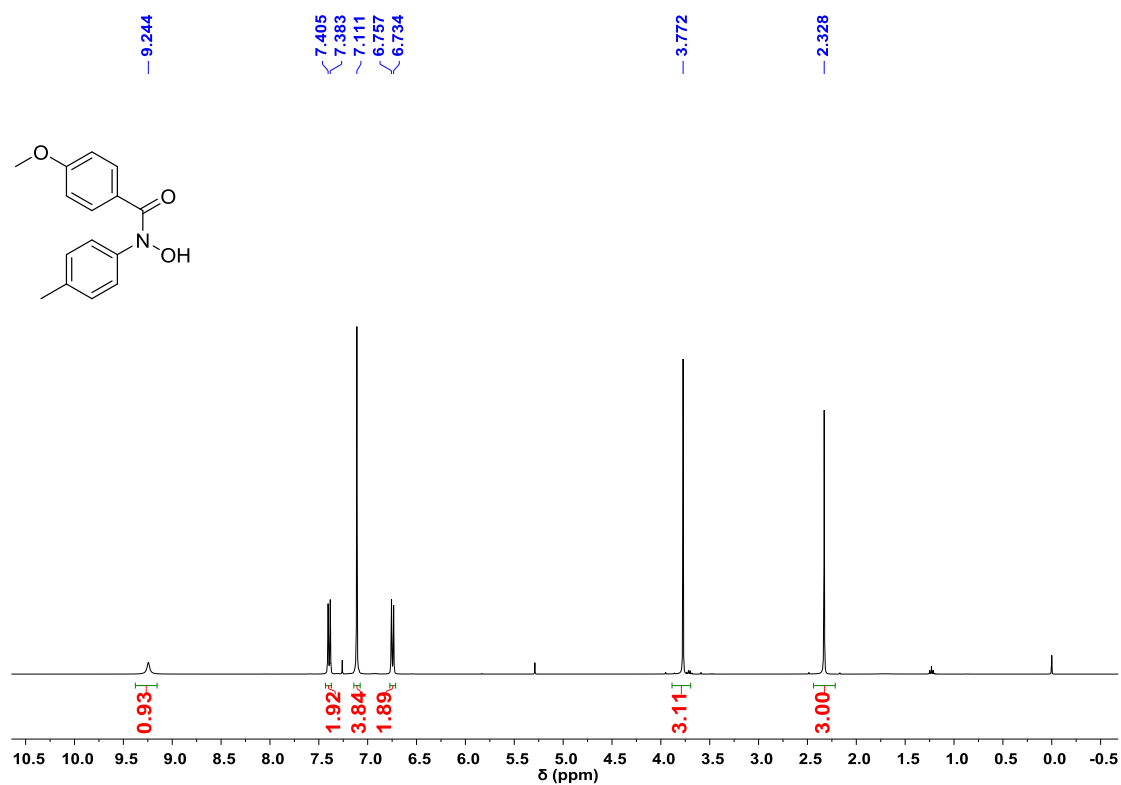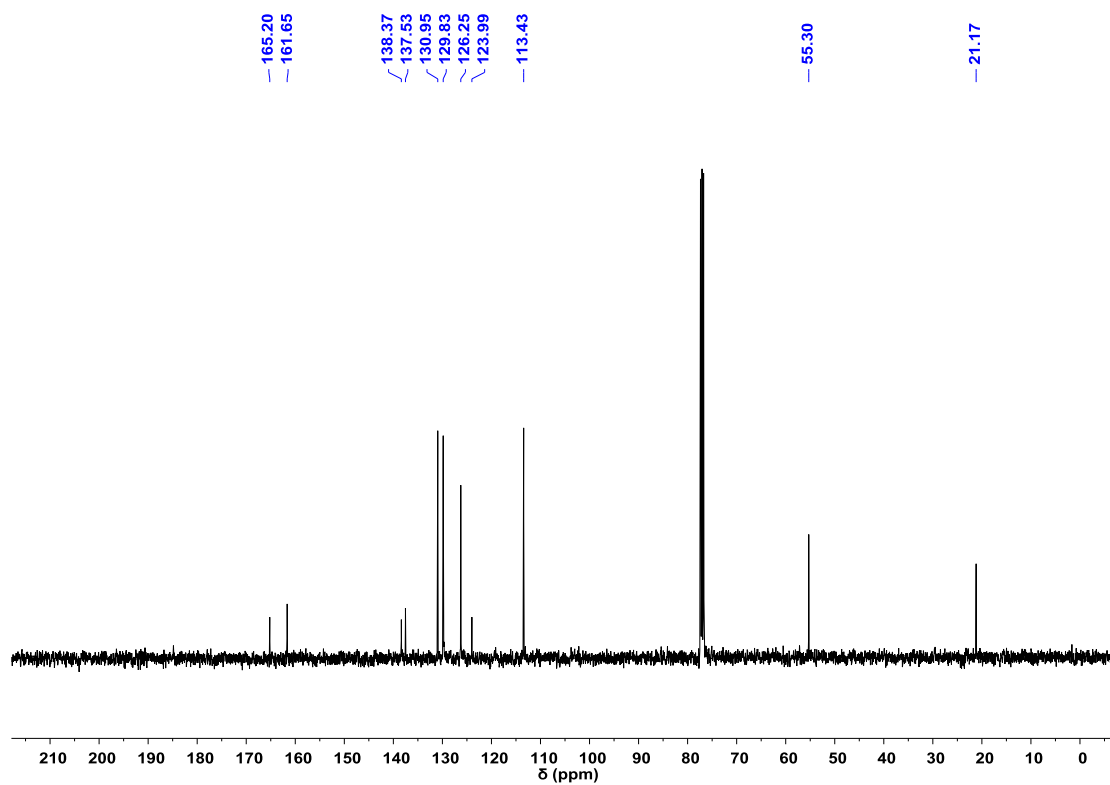

# Copies of $^1\text{H}$ , $^{13}\text{C}$ , and $^{19}\text{F}$ NMR spectra of products **3**

## 5-Fluoro-2-((2,4,6-trinitrophenyl)amino)phenyl benzoate (**3aa**)

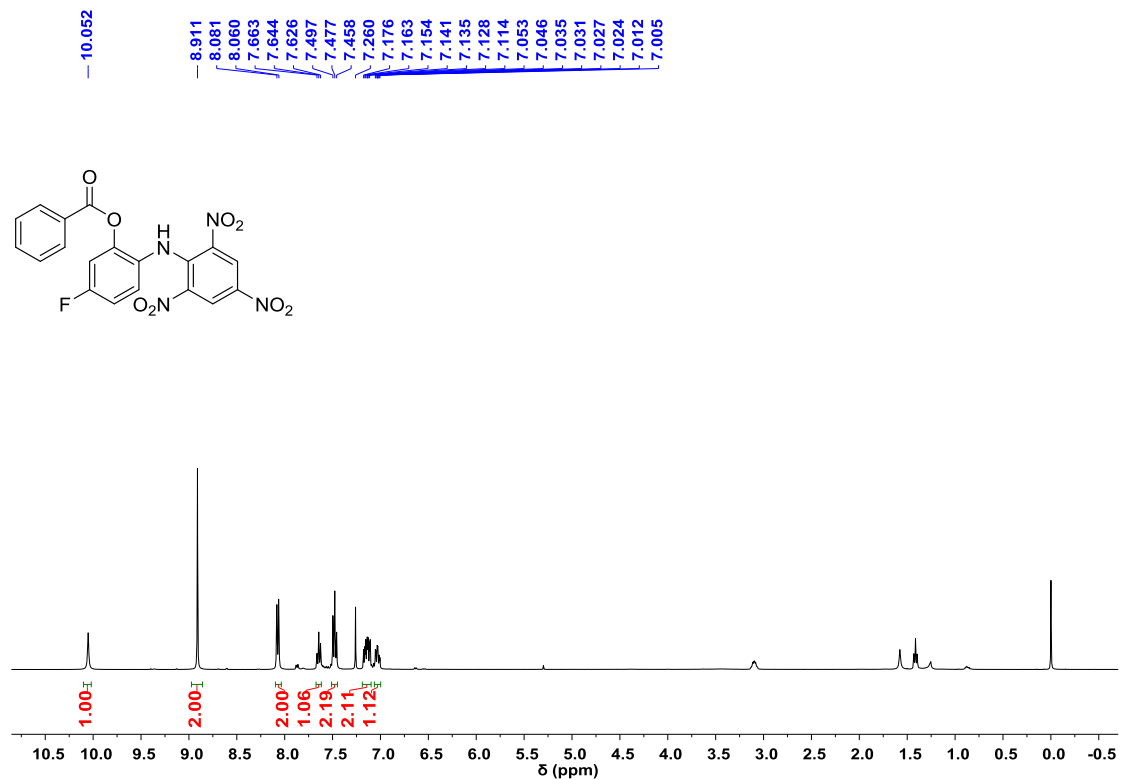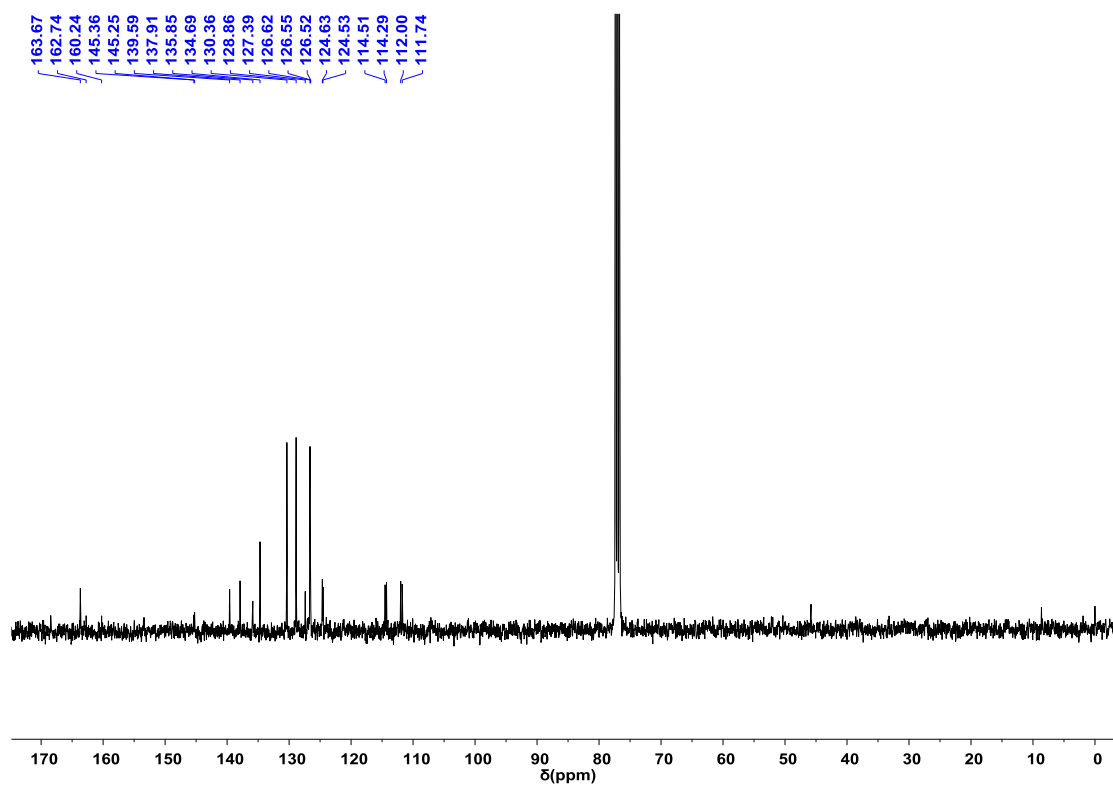

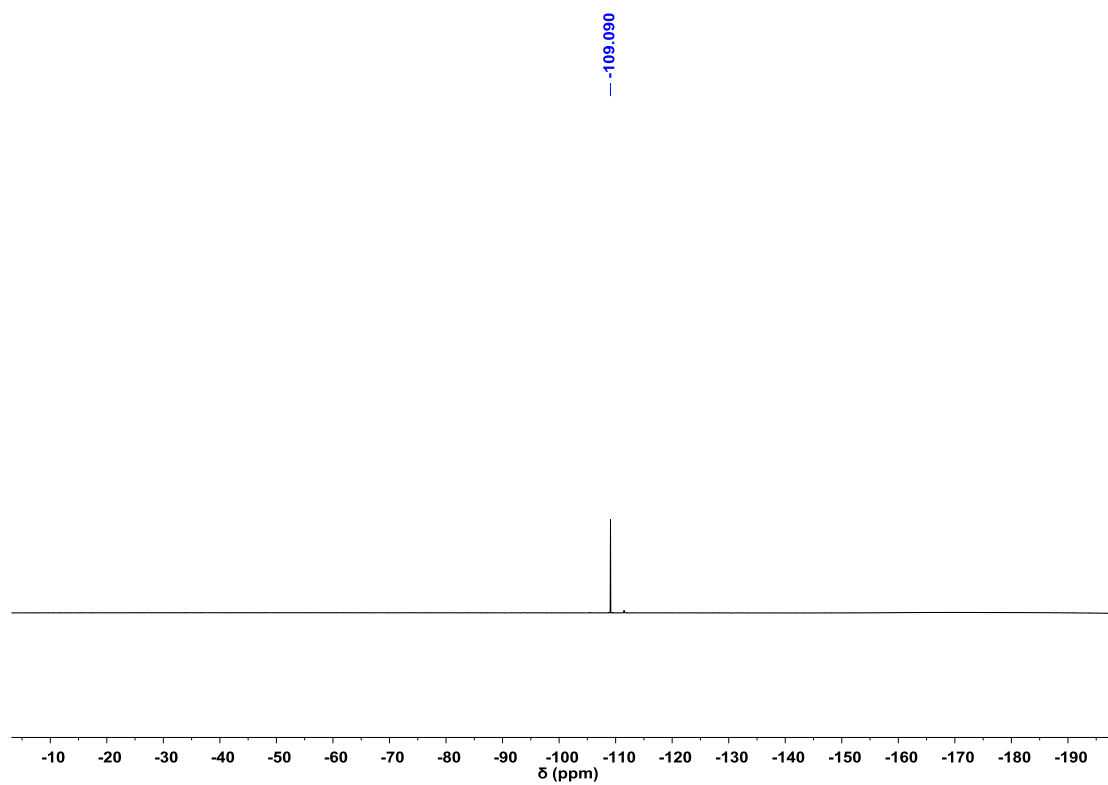

5-Methyl-2-((2,4,6-trinitrophenyl)amino)phenyl benzoate (**3ba**)

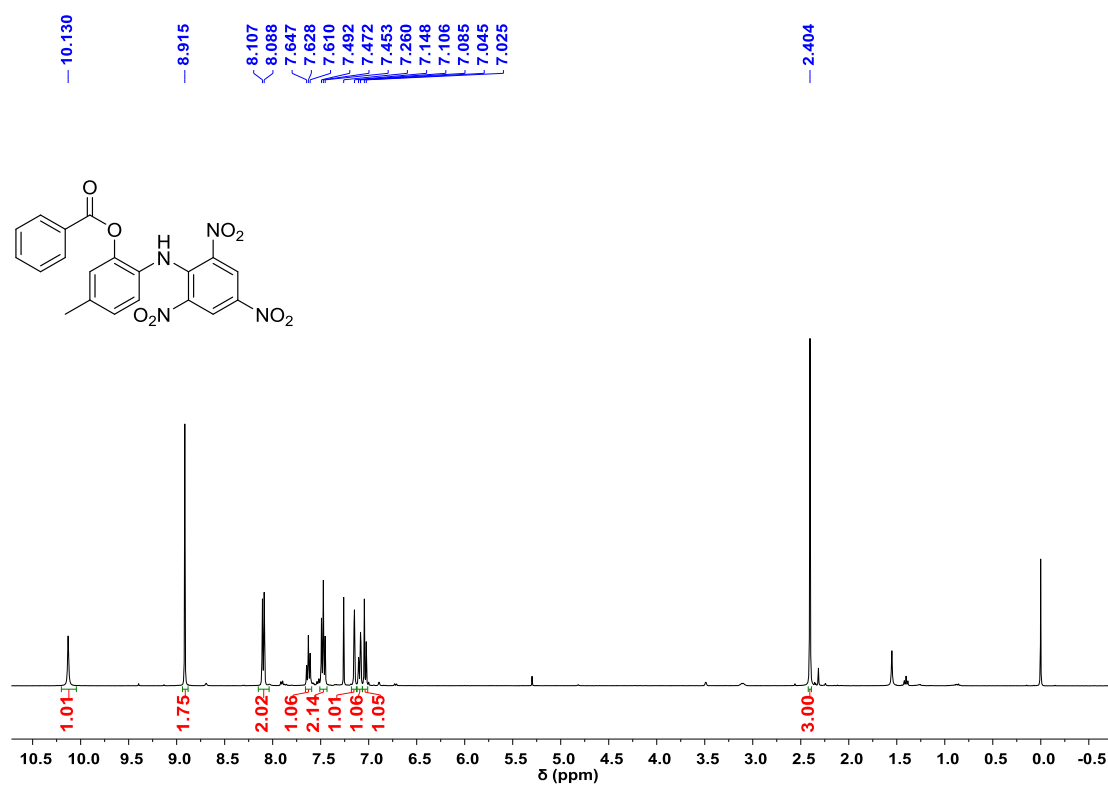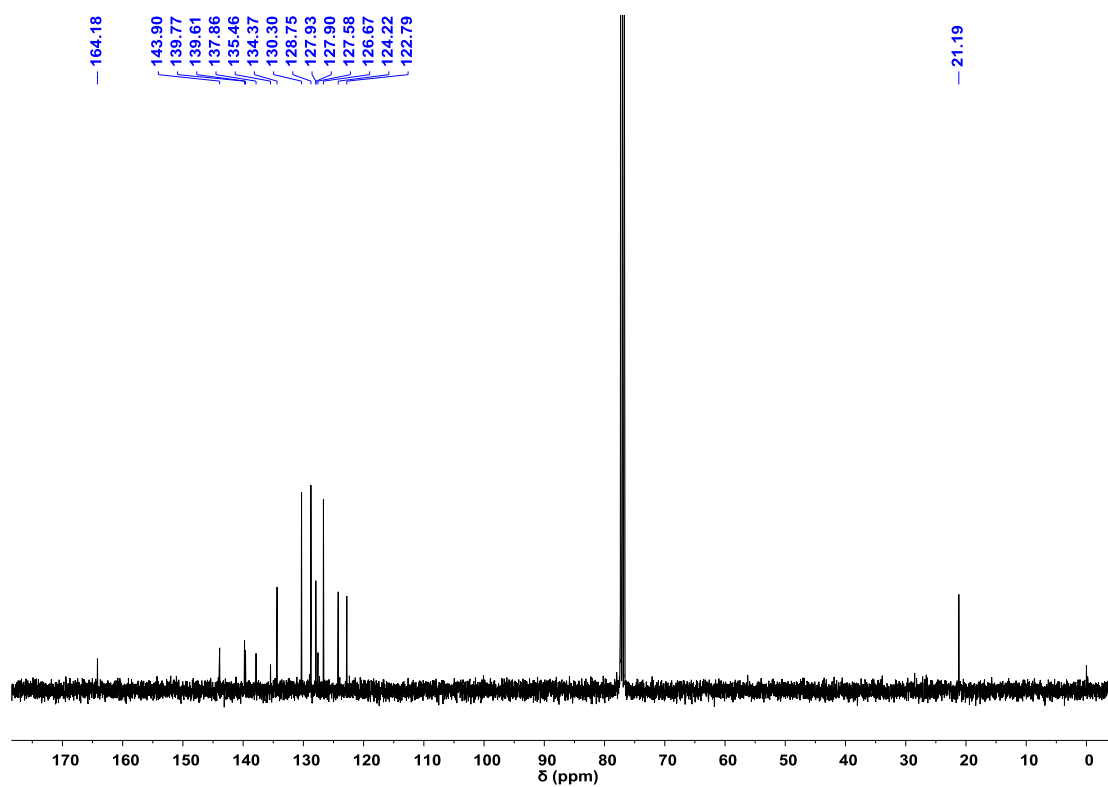

5-Chloro-2-((2,4,6-trinitrophenyl)amino)phenyl benzoate (**3ca**)

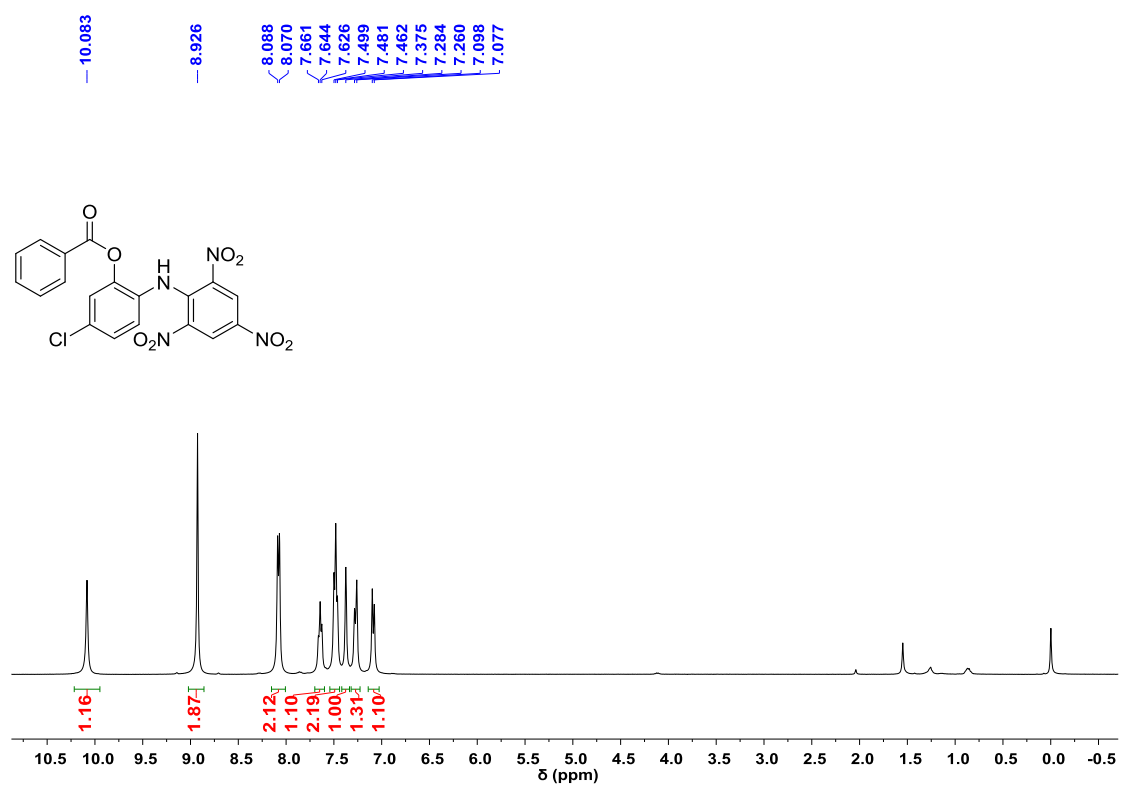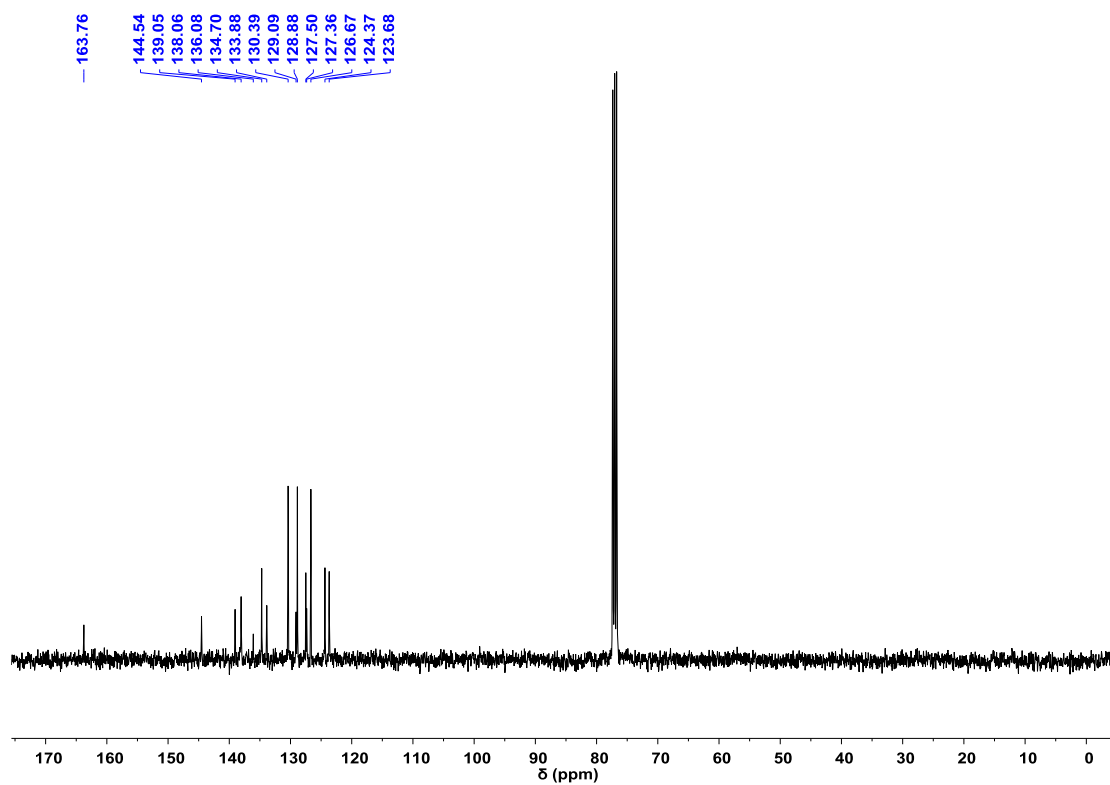

5-Bromo-2-((2,4,6-trinitrophenyl)amino)phenyl benzoate (**3da**)

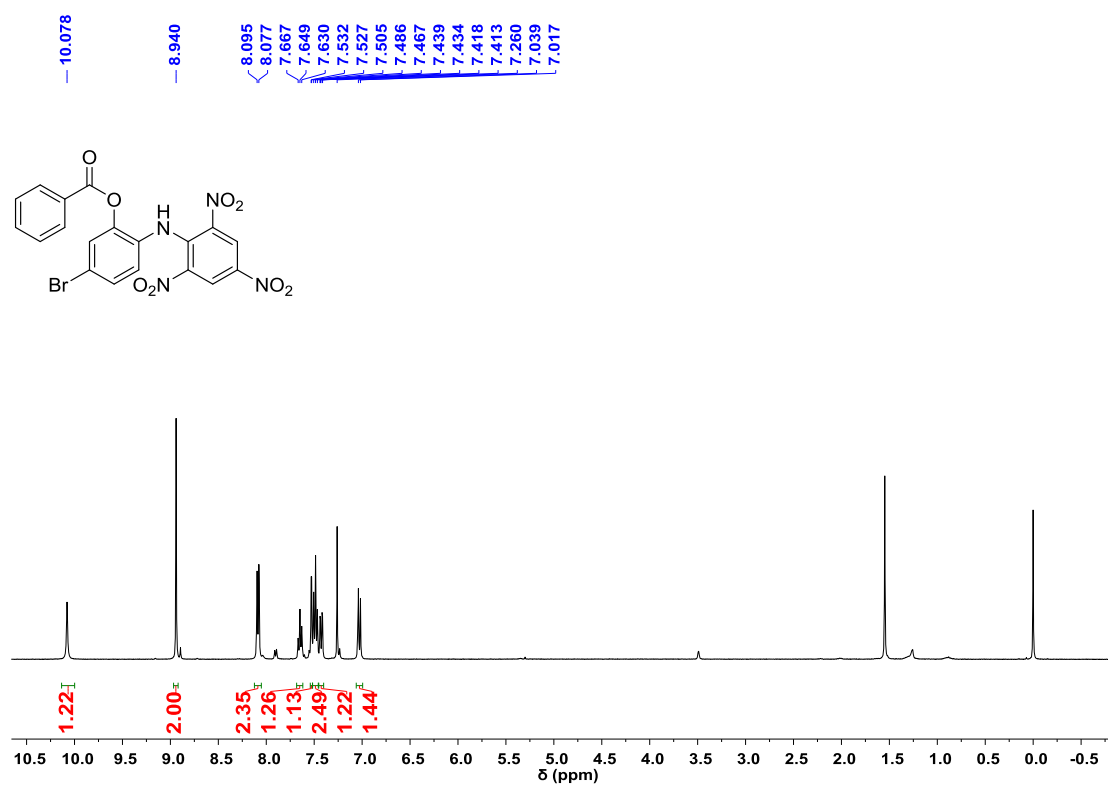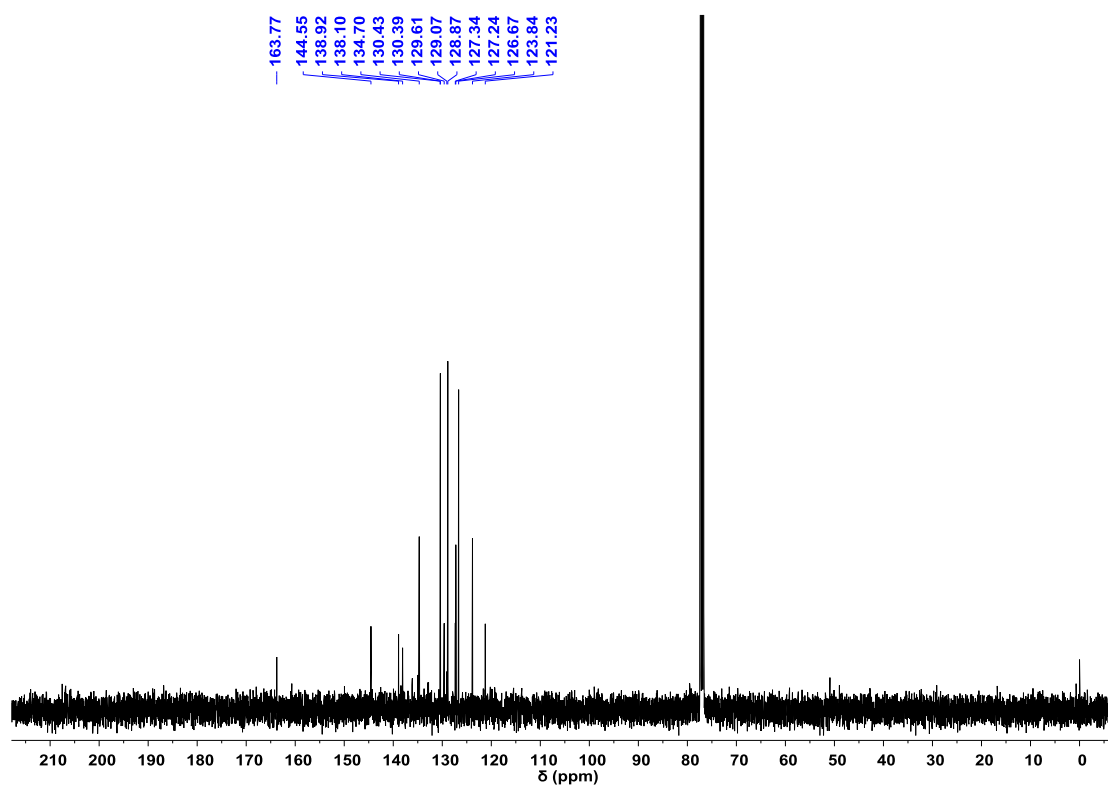

$^1\text{H}$ ,  $^{13}\text{C}$  and  $^{19}\text{F}$  NMR of 2-((2,6-Dinitro-4-(trifluoromethyl)phenyl)amino)-5-methylphenyl benzoate (**3bb**)

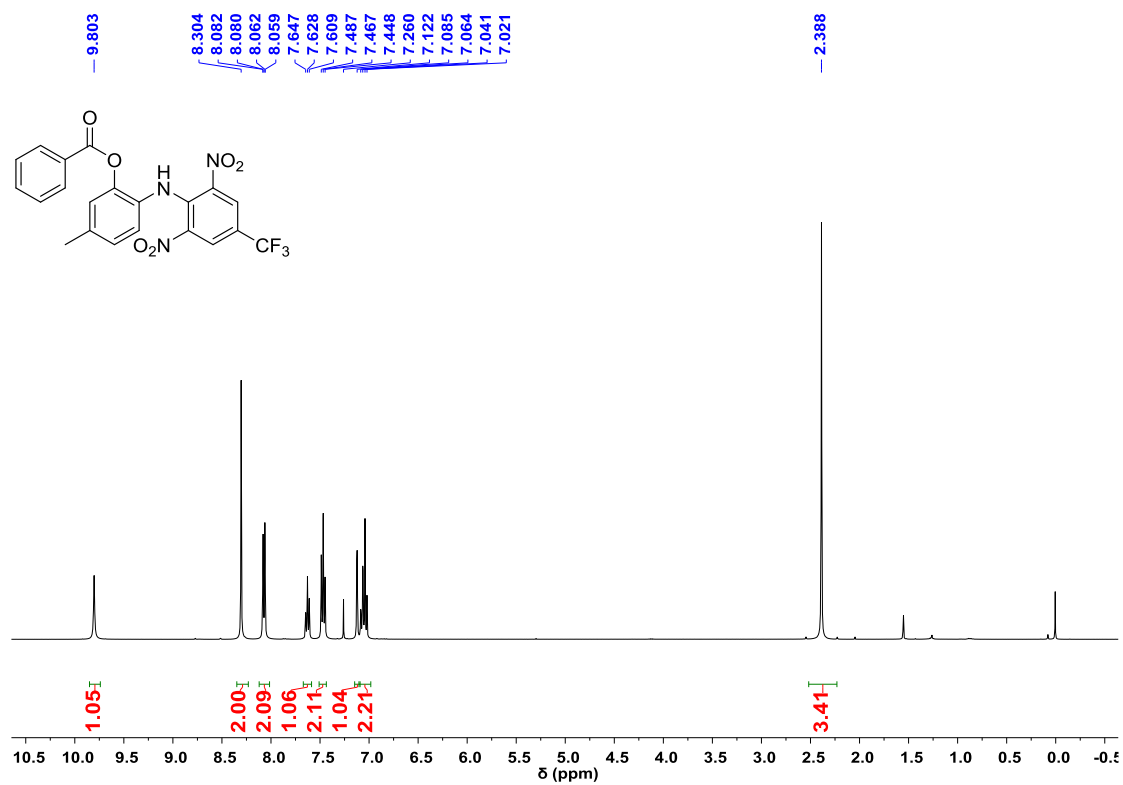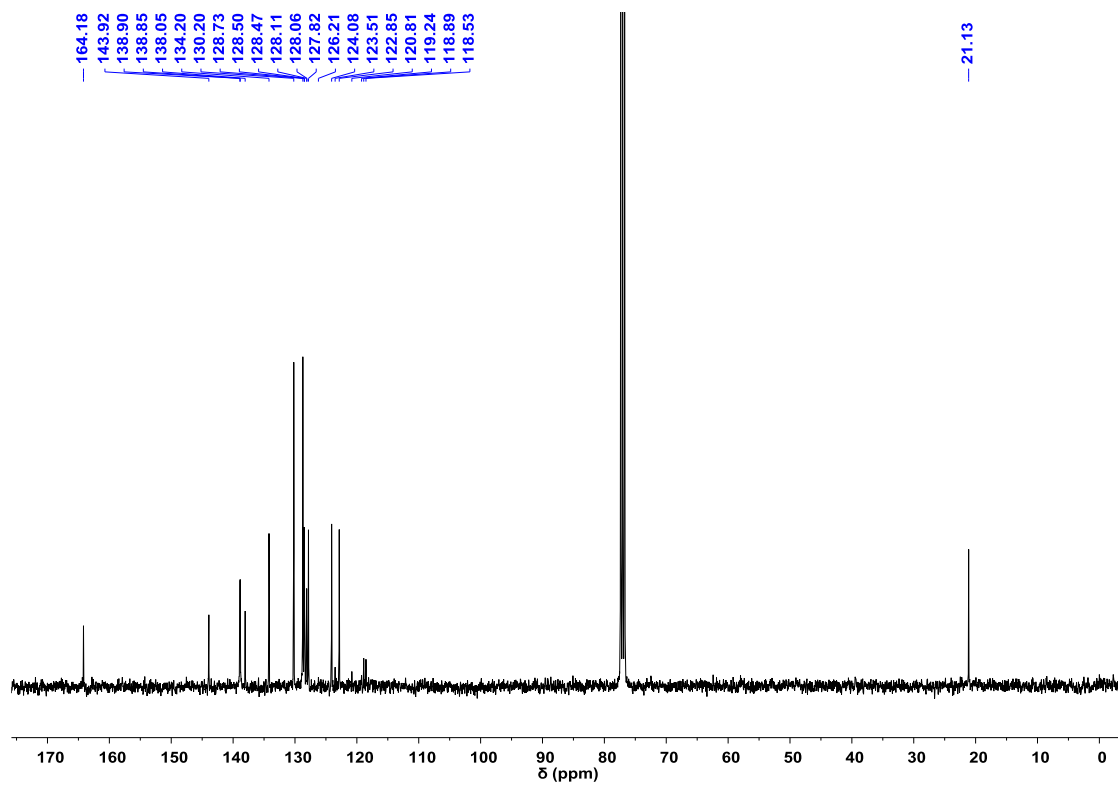

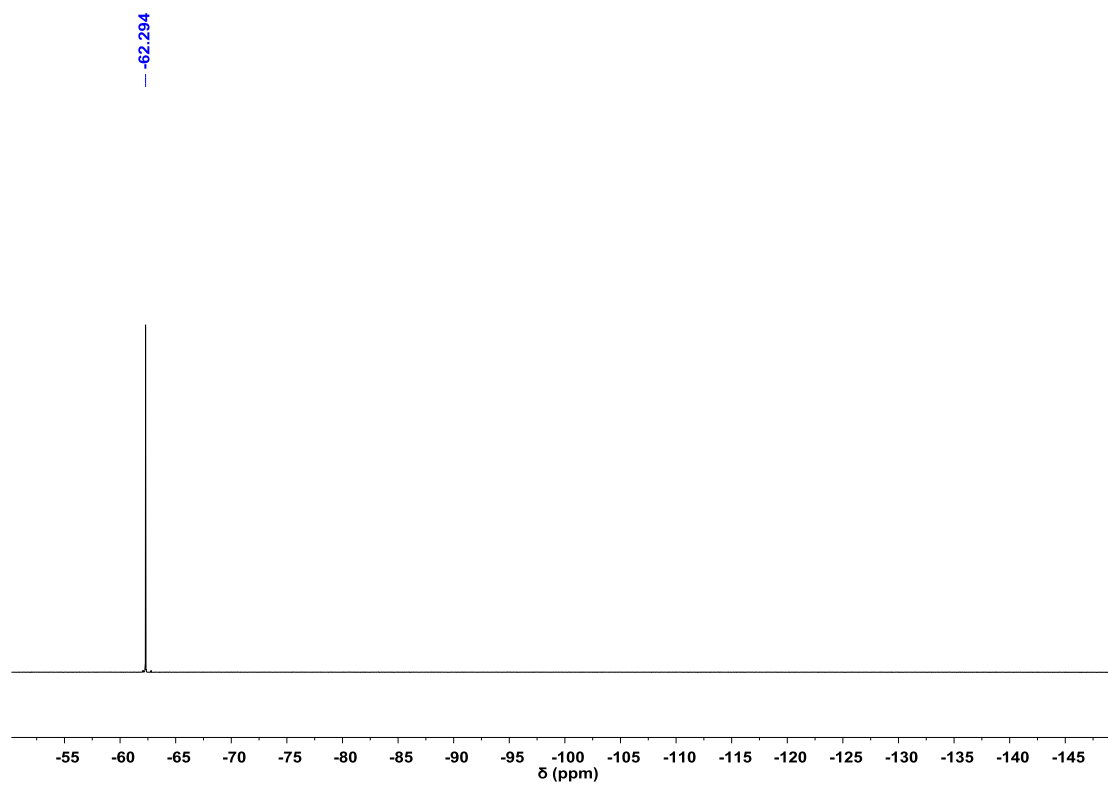



$^1\text{H}$ ,  $^{13}\text{C}$  and  $^{19}\text{F}$  NMR of 5-Chloro-2-((2,6-dinitro-4-(trifluoromethyl)phenyl)amino)phenyl benzoate (**3cb**)

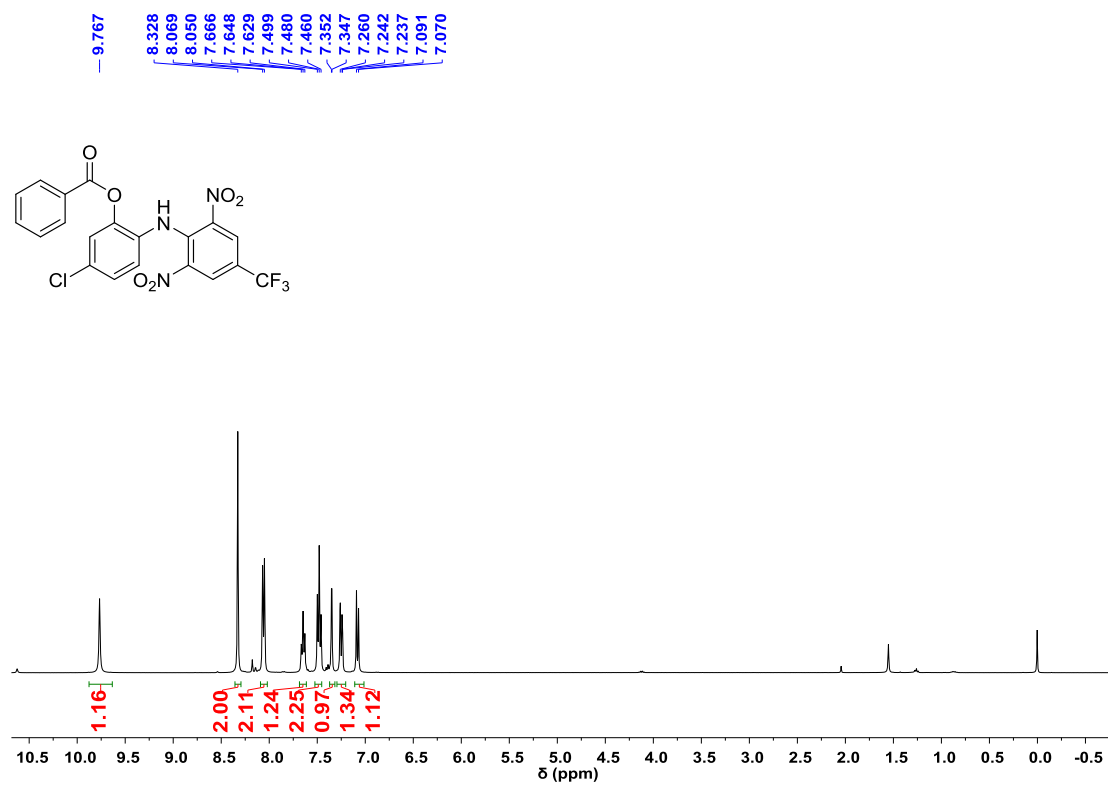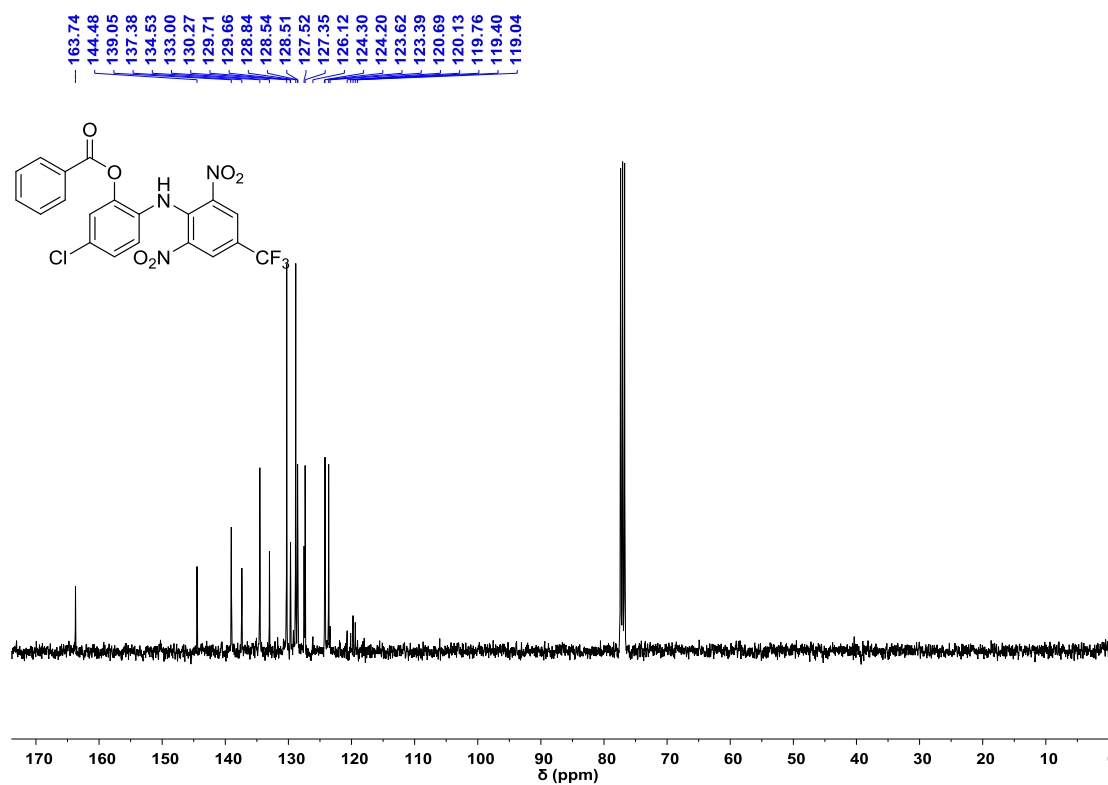

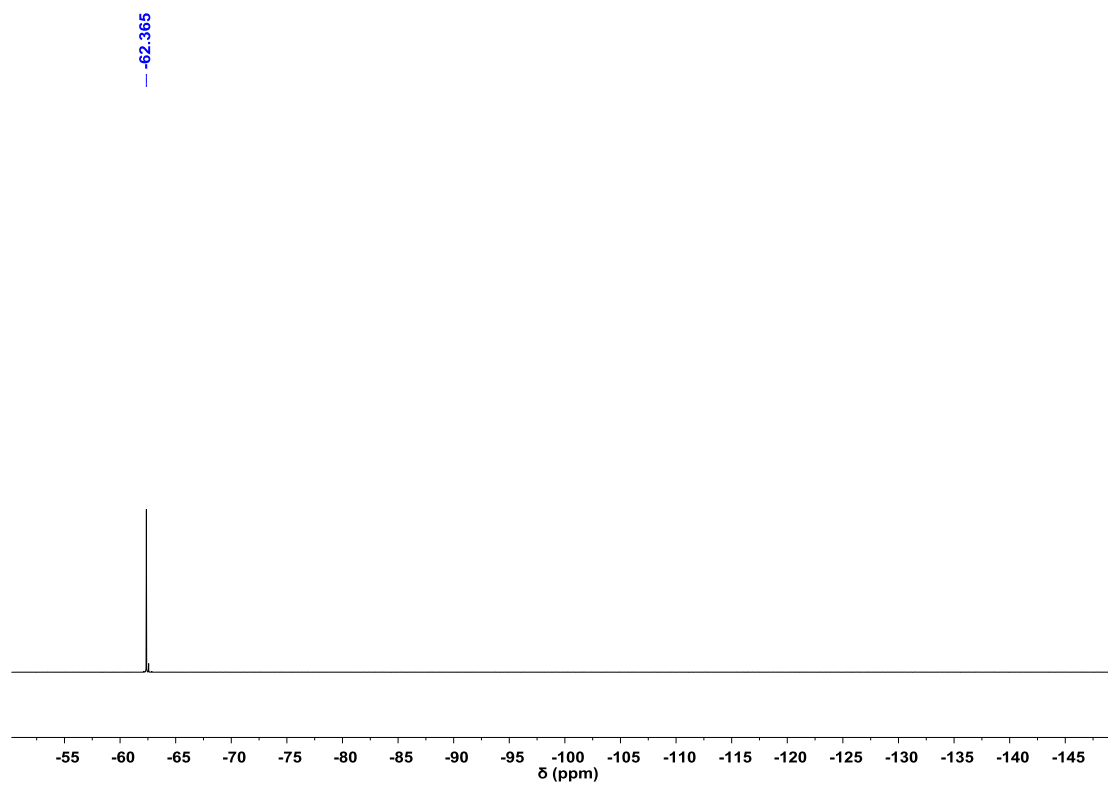

$^1\text{H}$ ,  $^{13}\text{C}$  and  $^{19}\text{F}$  NMR of 5-Bromo-2-((2,6-dinitro-4-(trifluoromethyl)phenyl)amino)phenyl benzoate (**3db**)

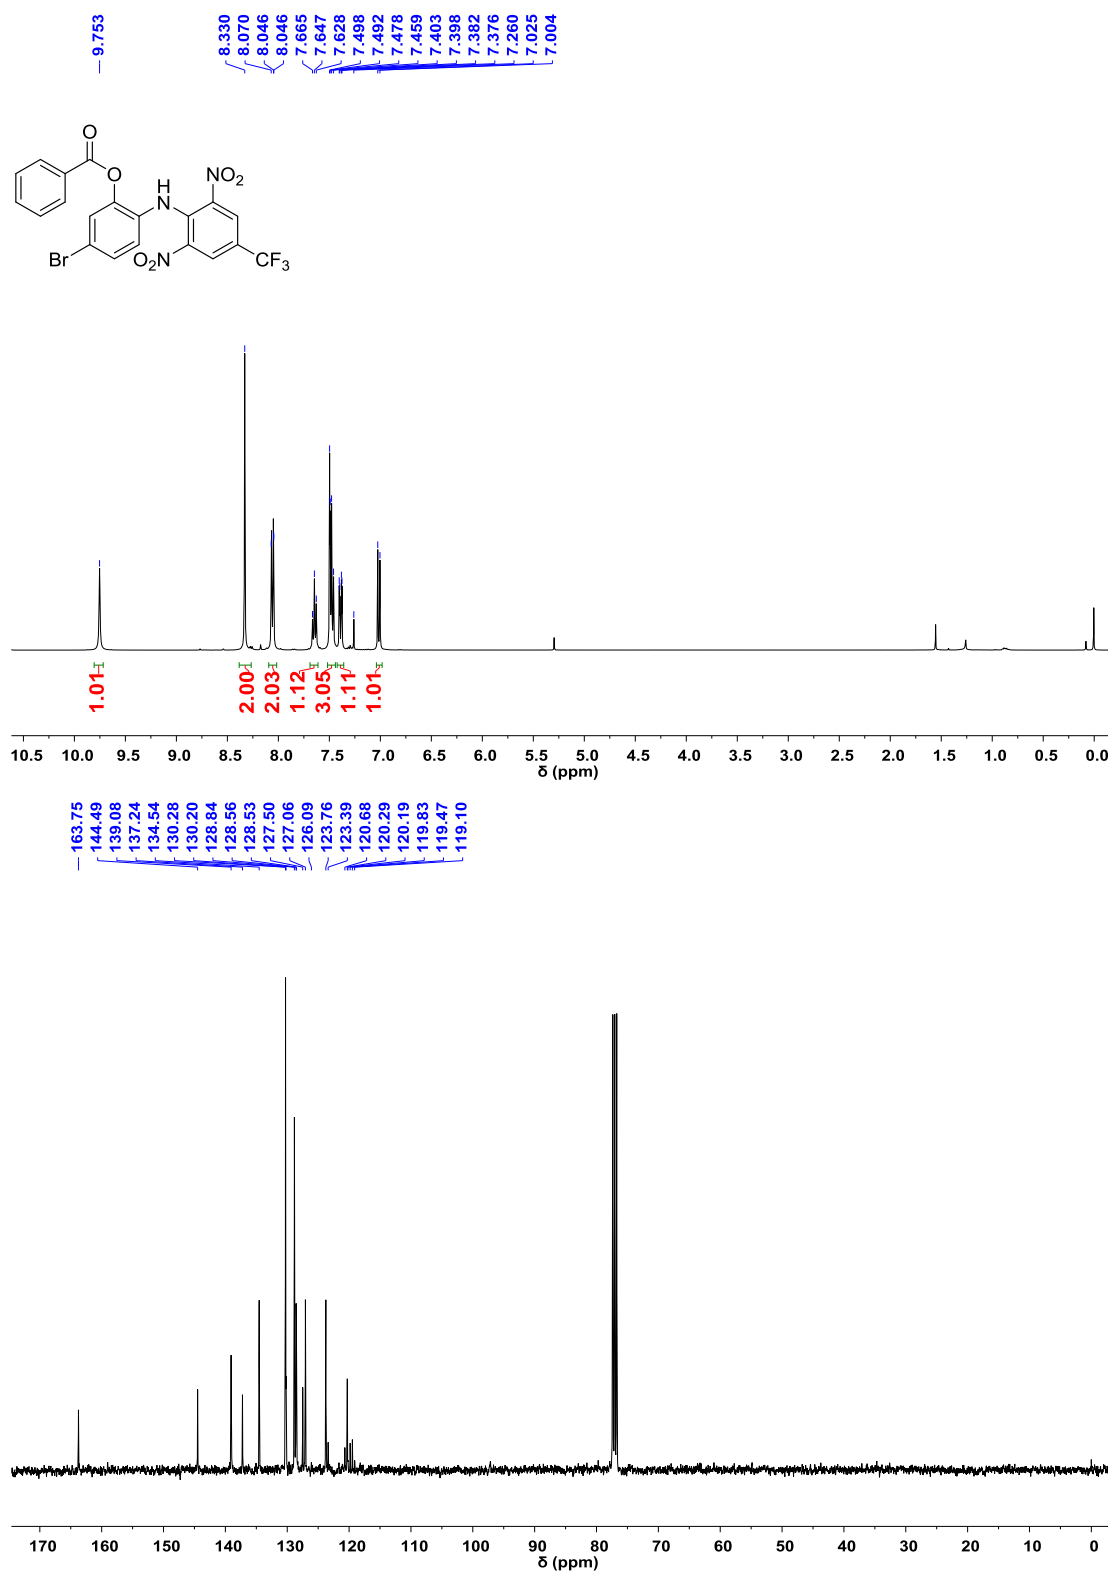

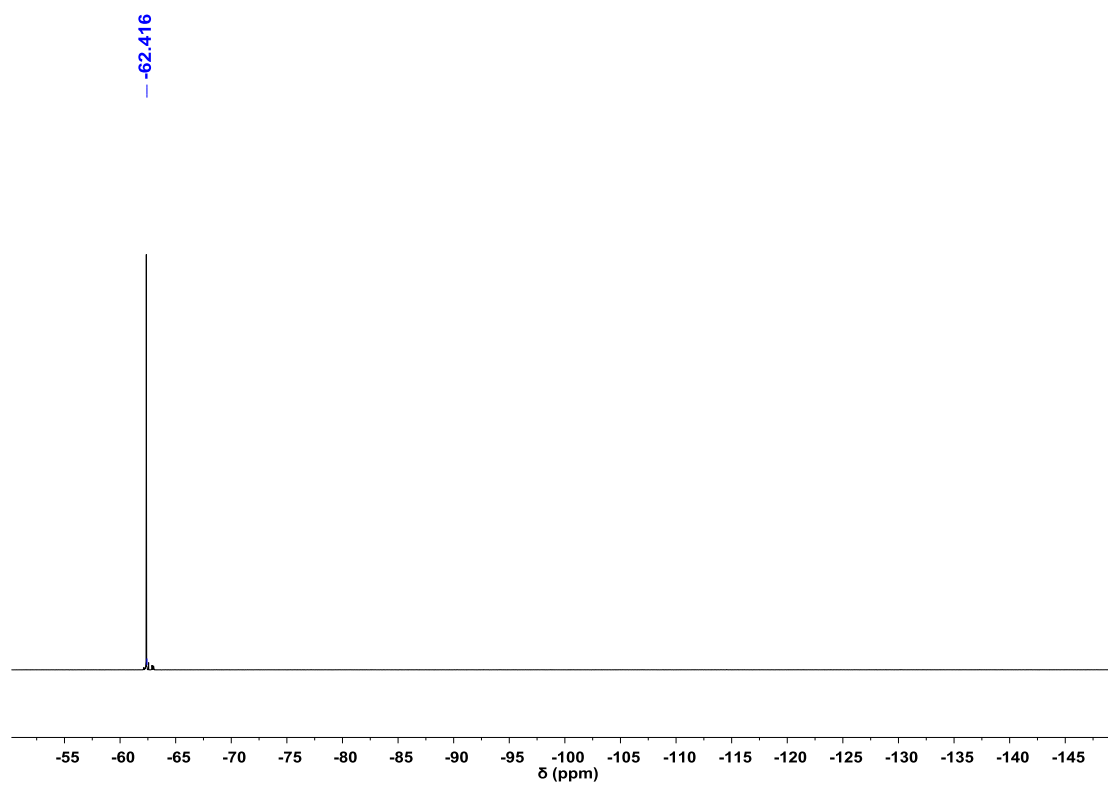

$^1\text{H}$ ,  $^{13}\text{C}$  and  $^{19}\text{F}$  NMR of 2-((2,6-Dinitro-4-(trifluoromethyl)phenyl)amino)-5-methylphenyl acetate (**3eb**)

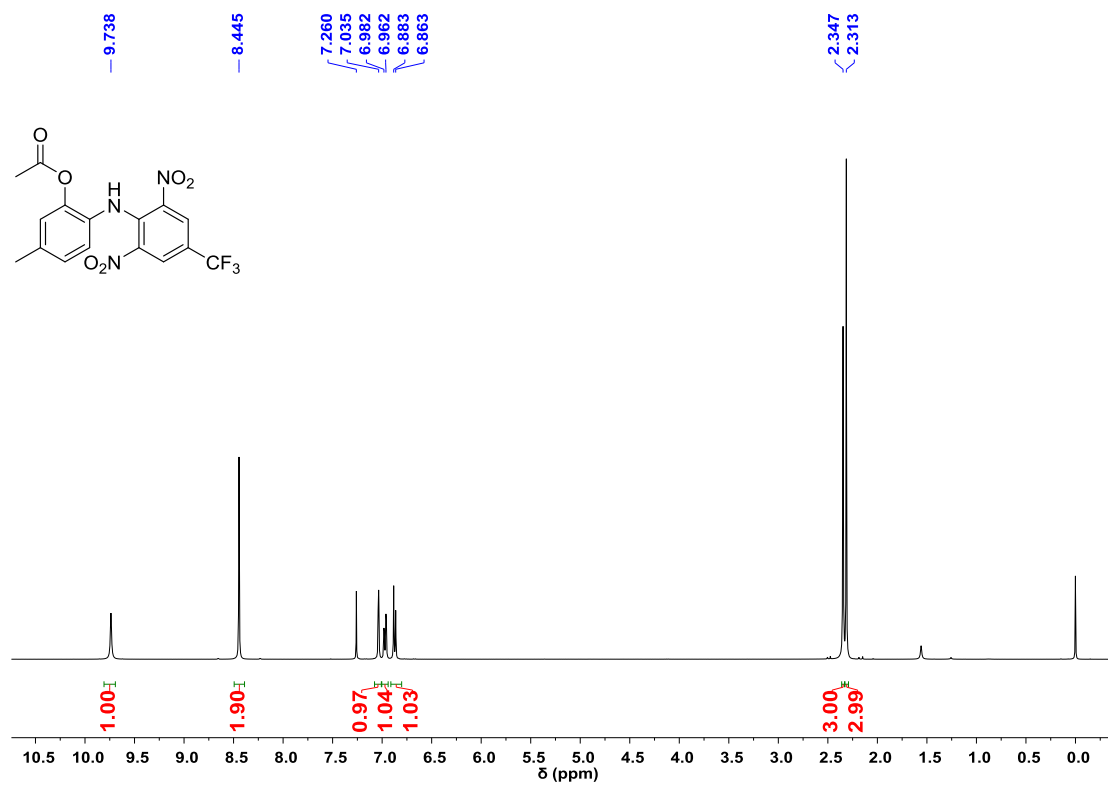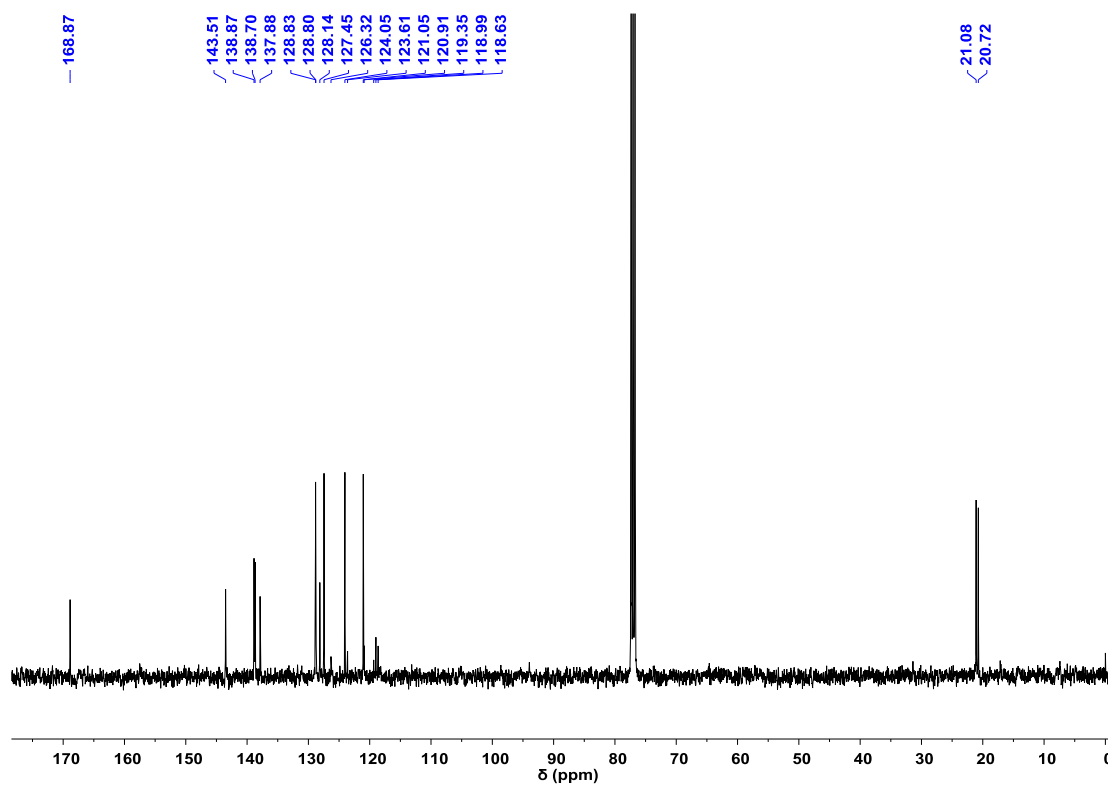

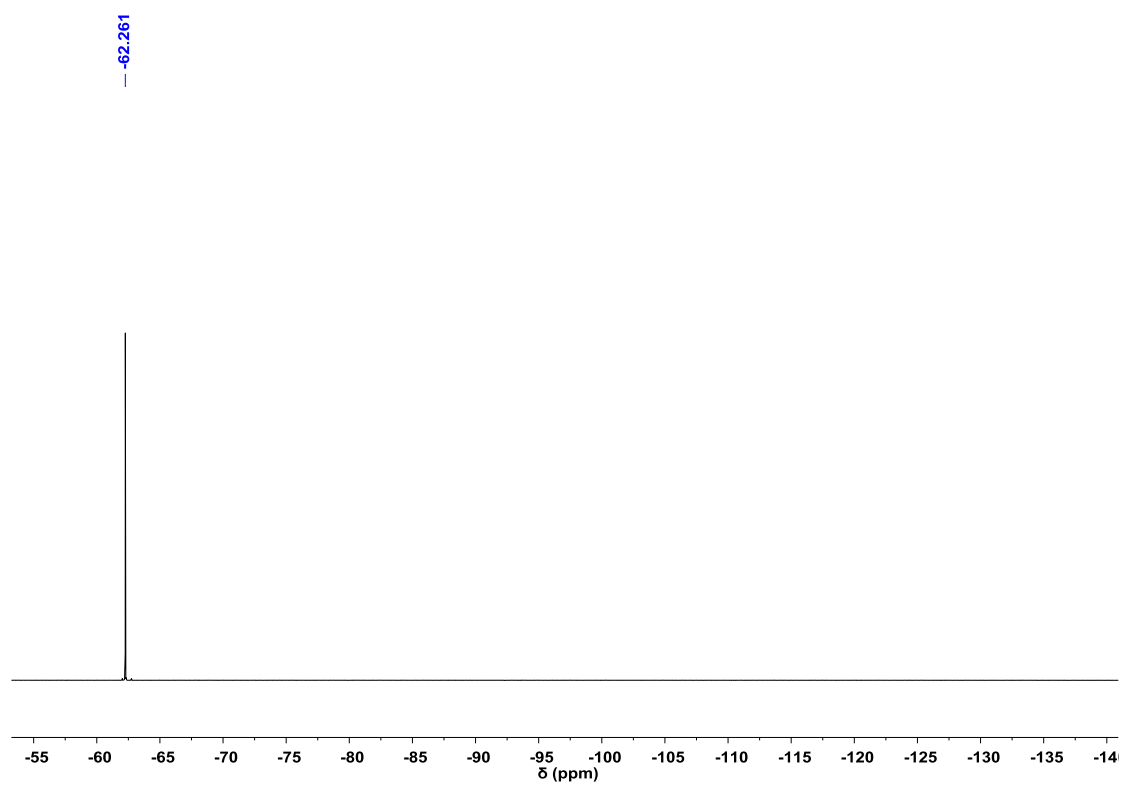

$^1\text{H}$ ,  $^{13}\text{C}$  and  $^{19}\text{F}$  NMR of 2-((2,6-Dinitro-4-(trifluoromethyl)phenyl)amino)-5-methylphenyl 4-methylbenzoate (**3fb**)

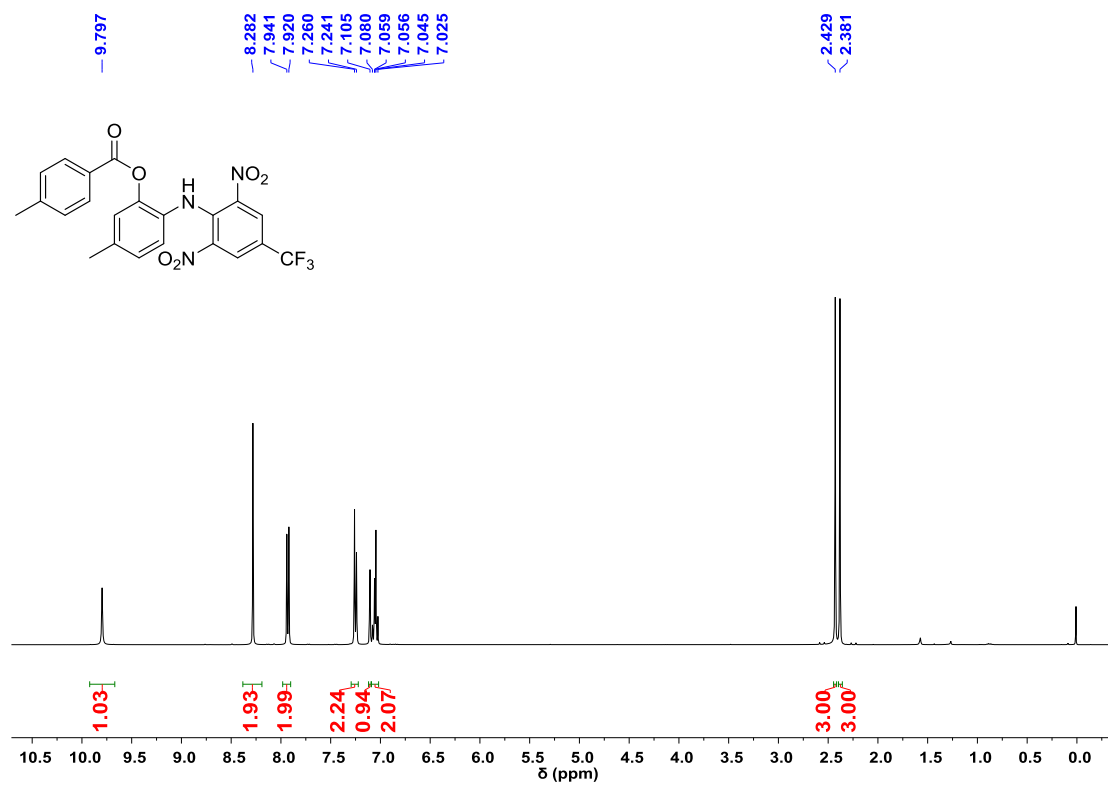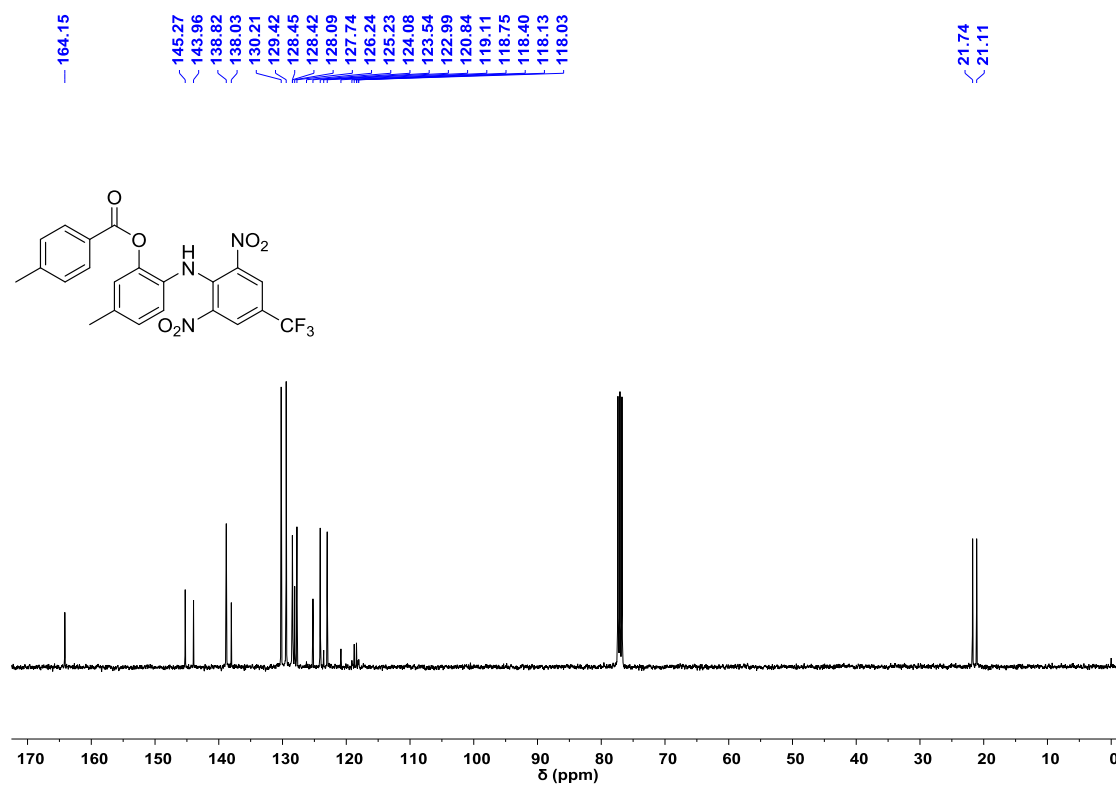

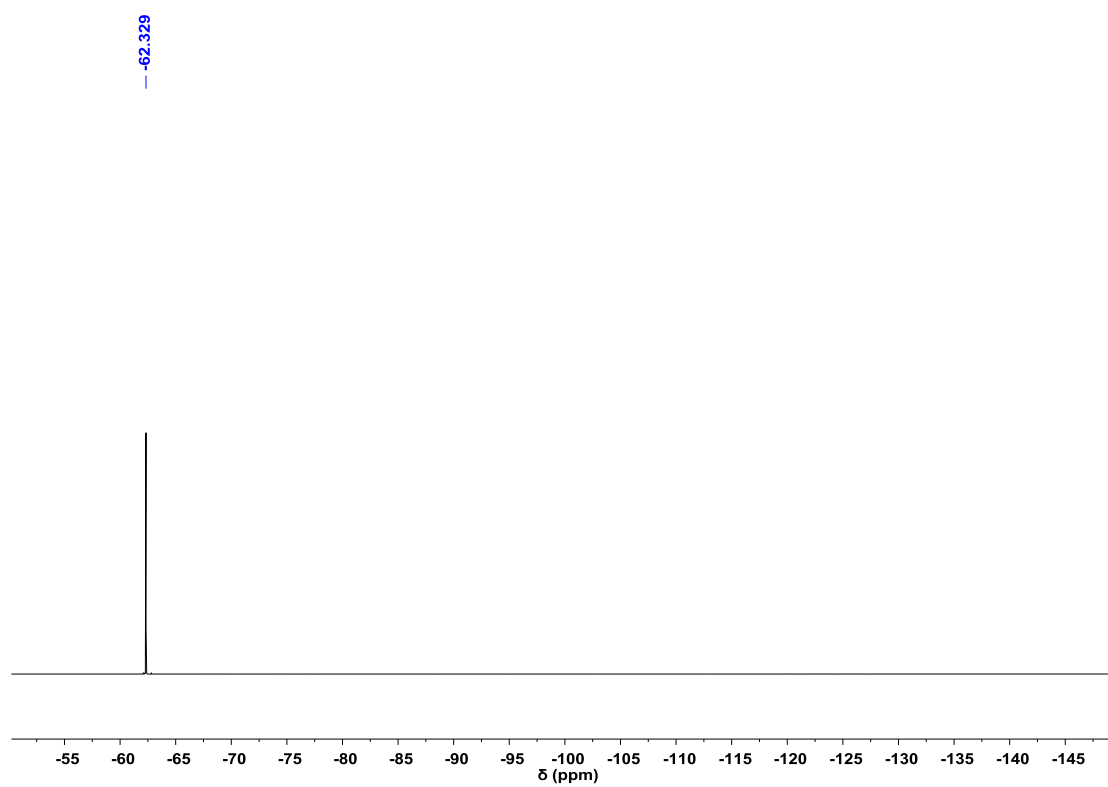



$^1\text{H}$ ,  $^{13}\text{C}$  and  $^{19}\text{F}$  NMR of 5-Chloro-2-((2,6-dinitro-4-(trifluoromethyl)phenyl)amino)phenyl 3-chlorobenzoate (**3gb**)

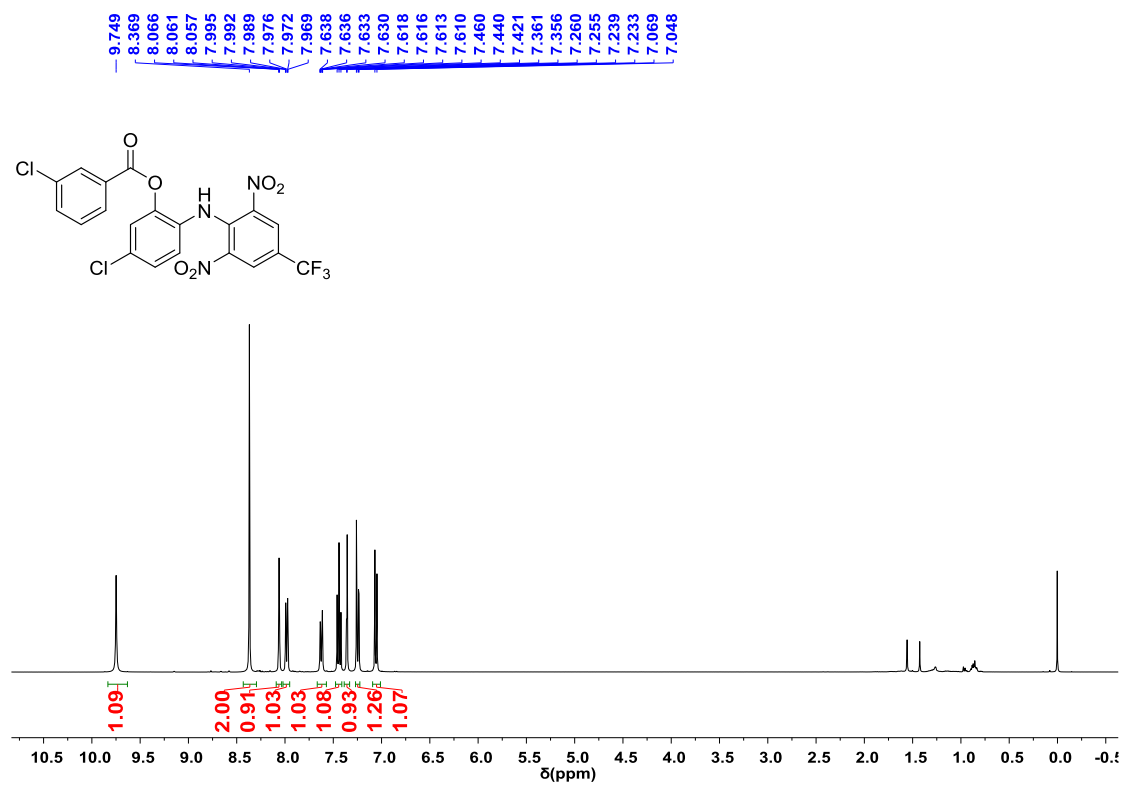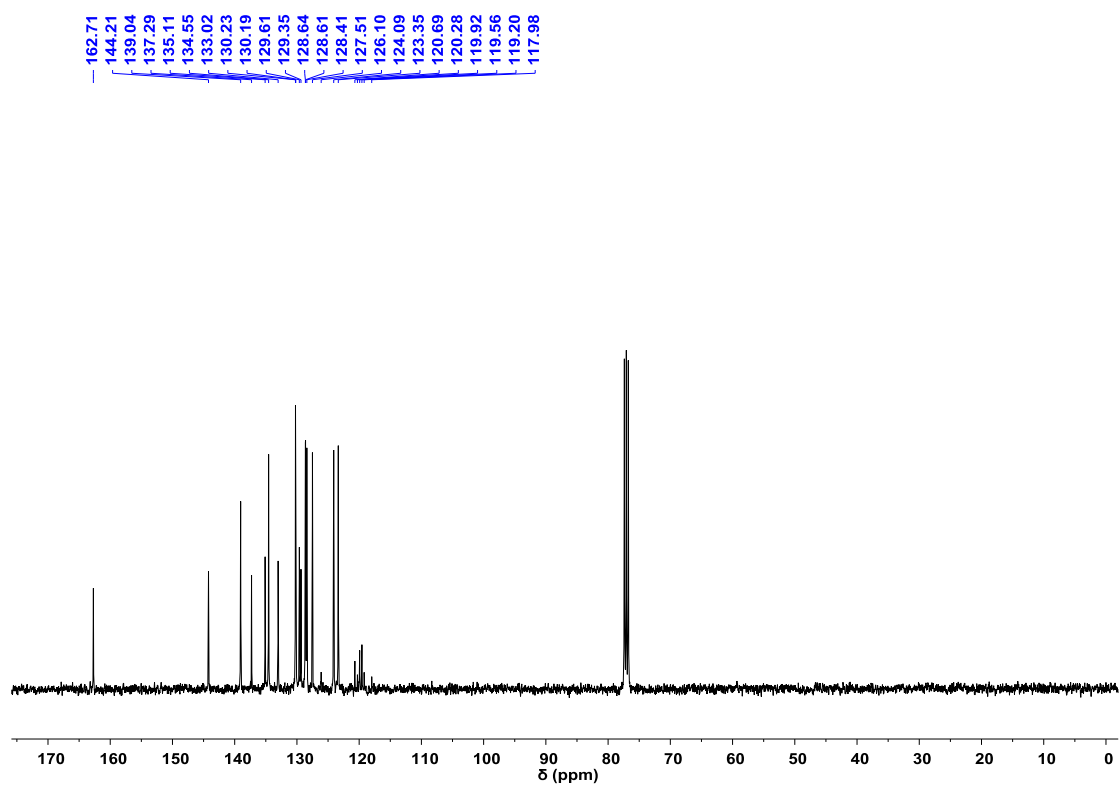

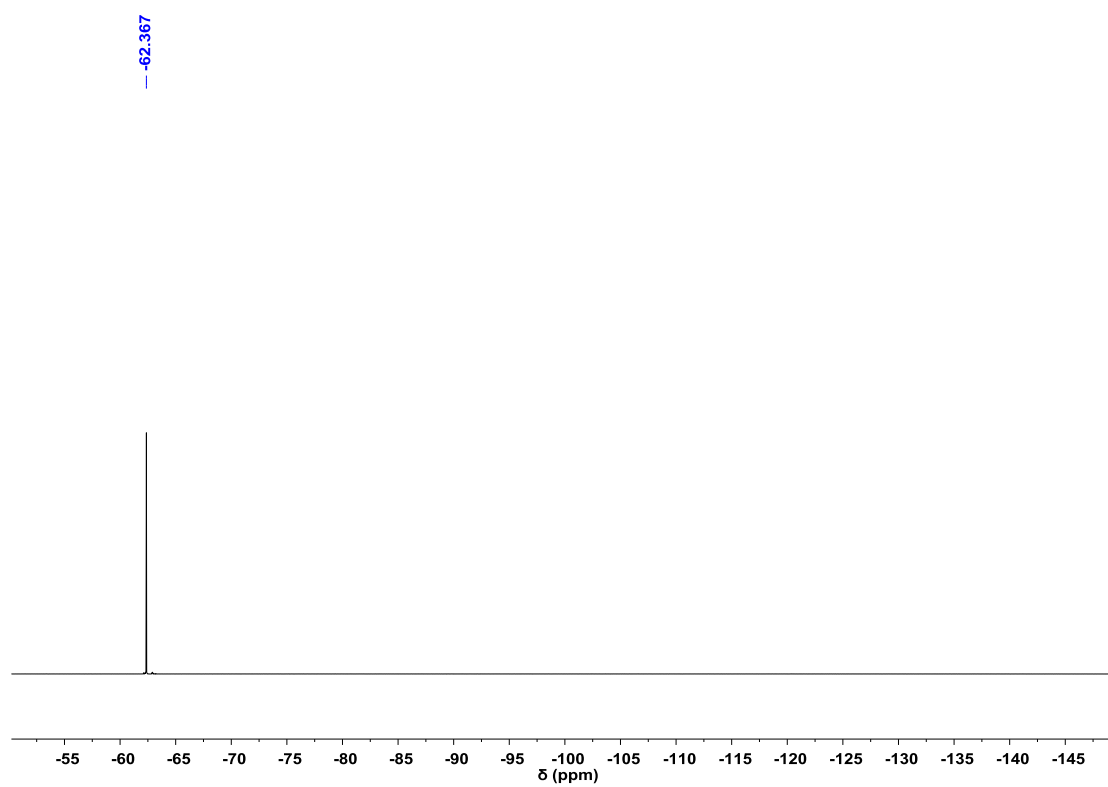

2-((2,6-Dichloro-4-nitrophenyl)amino)-5-fluorophenyl benzoate (**3ac**)

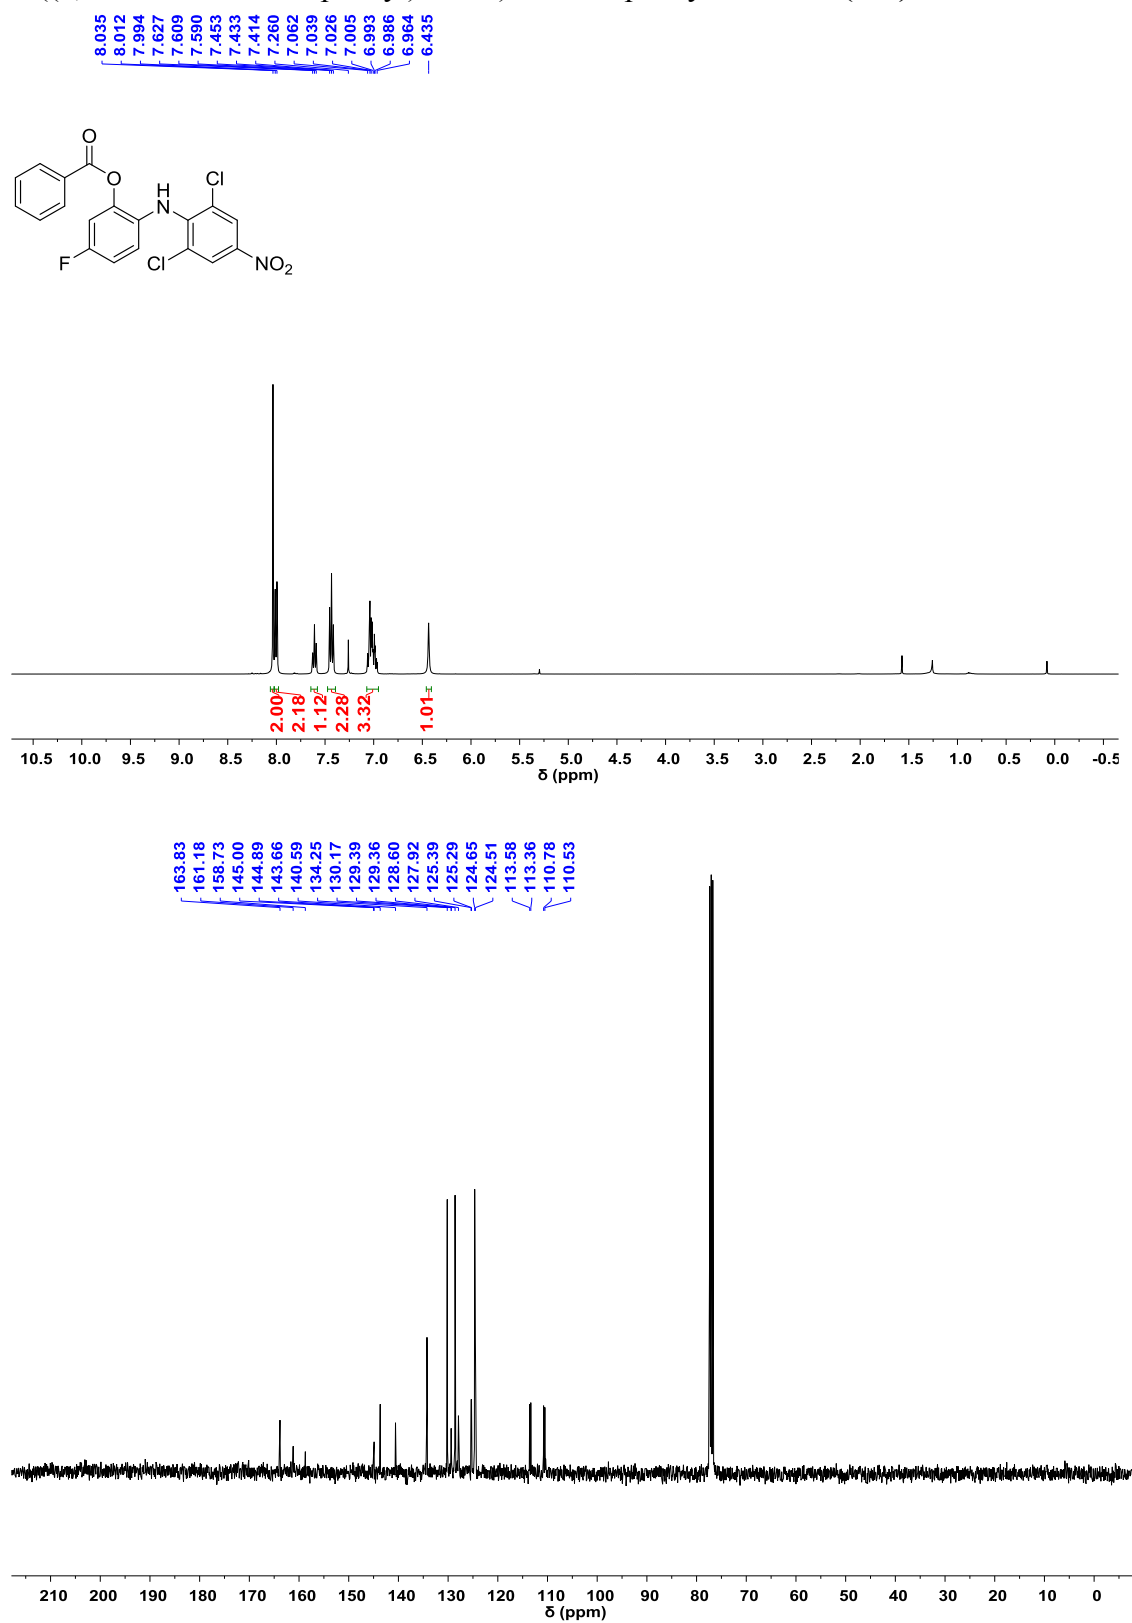

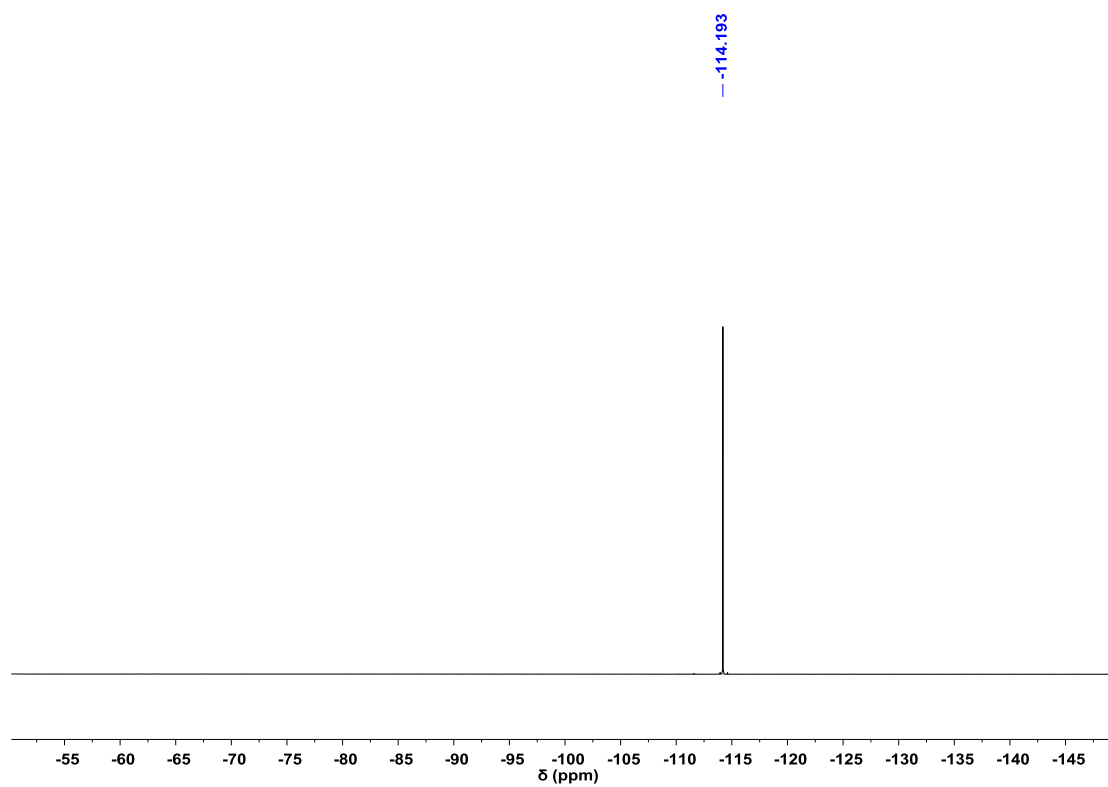

2-((2,6-Dichloro-4-nitrophenyl)amino)-5-methylphenyl benzoate (**3bc**)

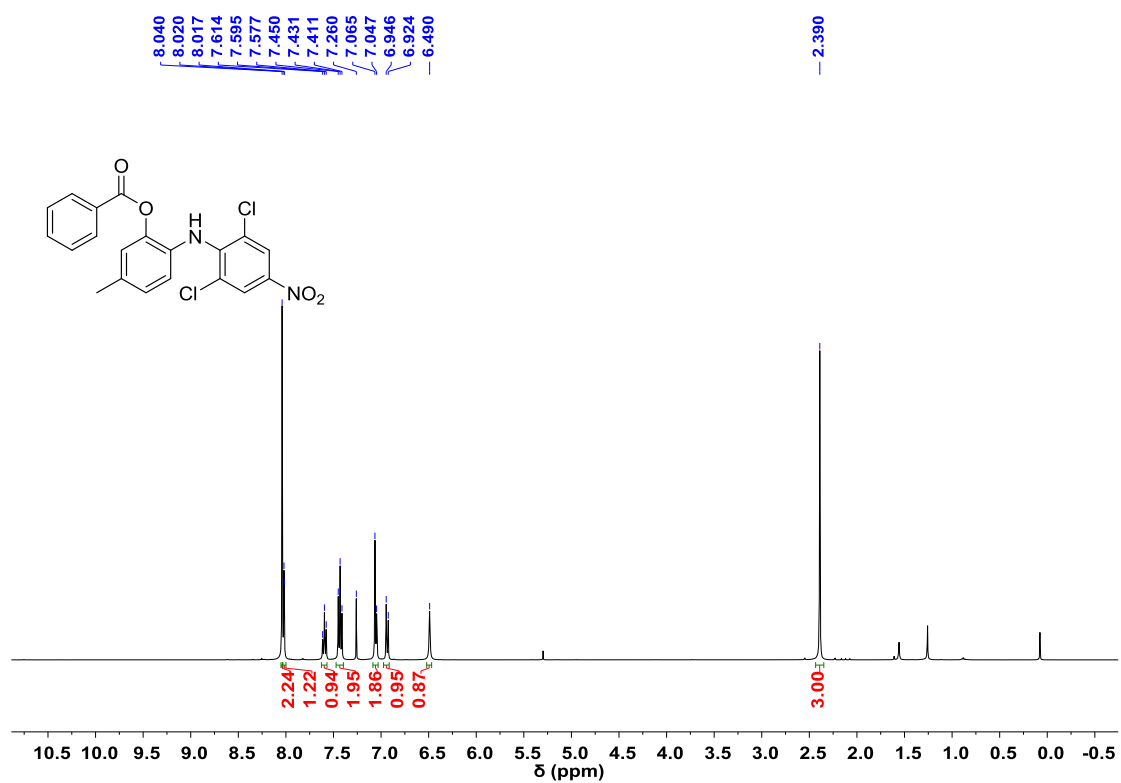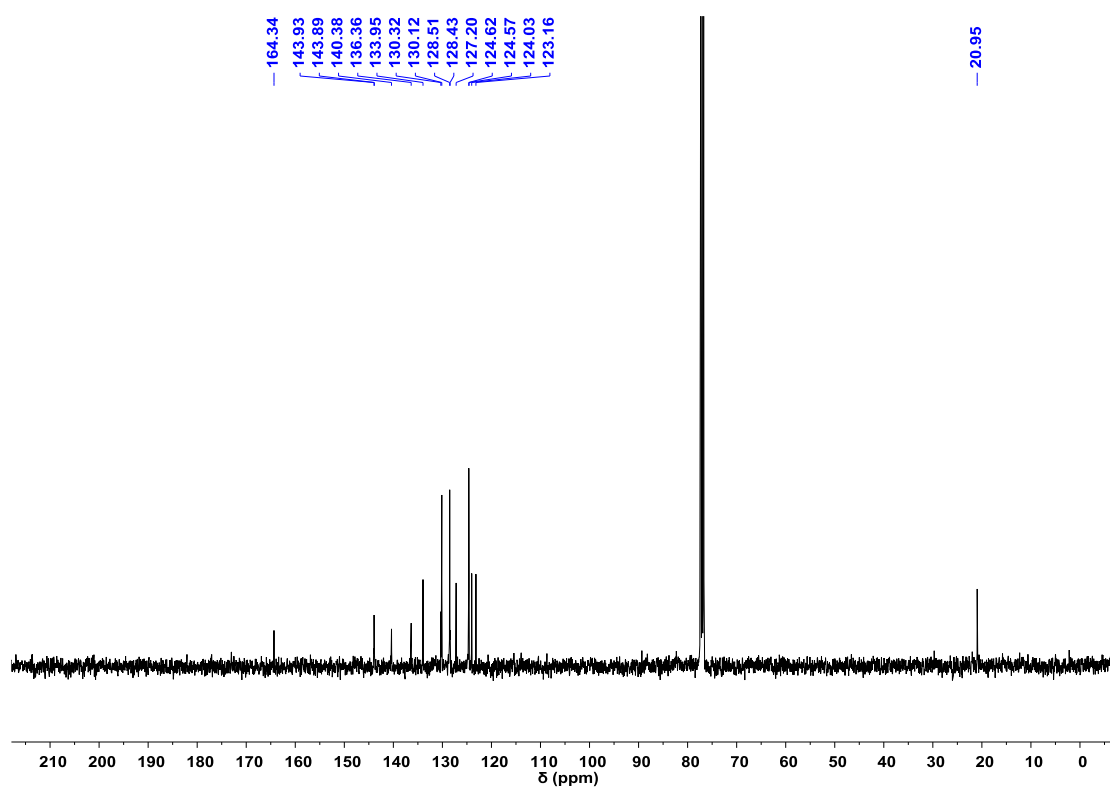

5-Chloro-2-((2,6-dichloro-4-nitrophenyl)amino)phenyl benzoate (**3cc**)

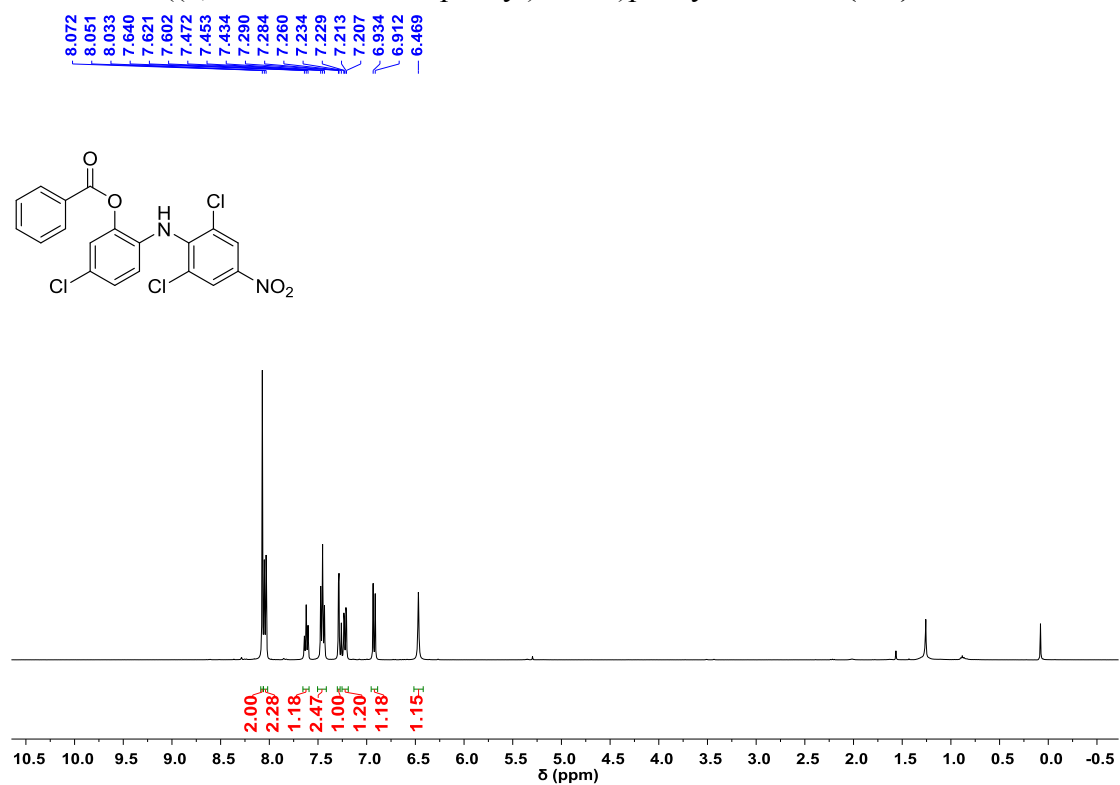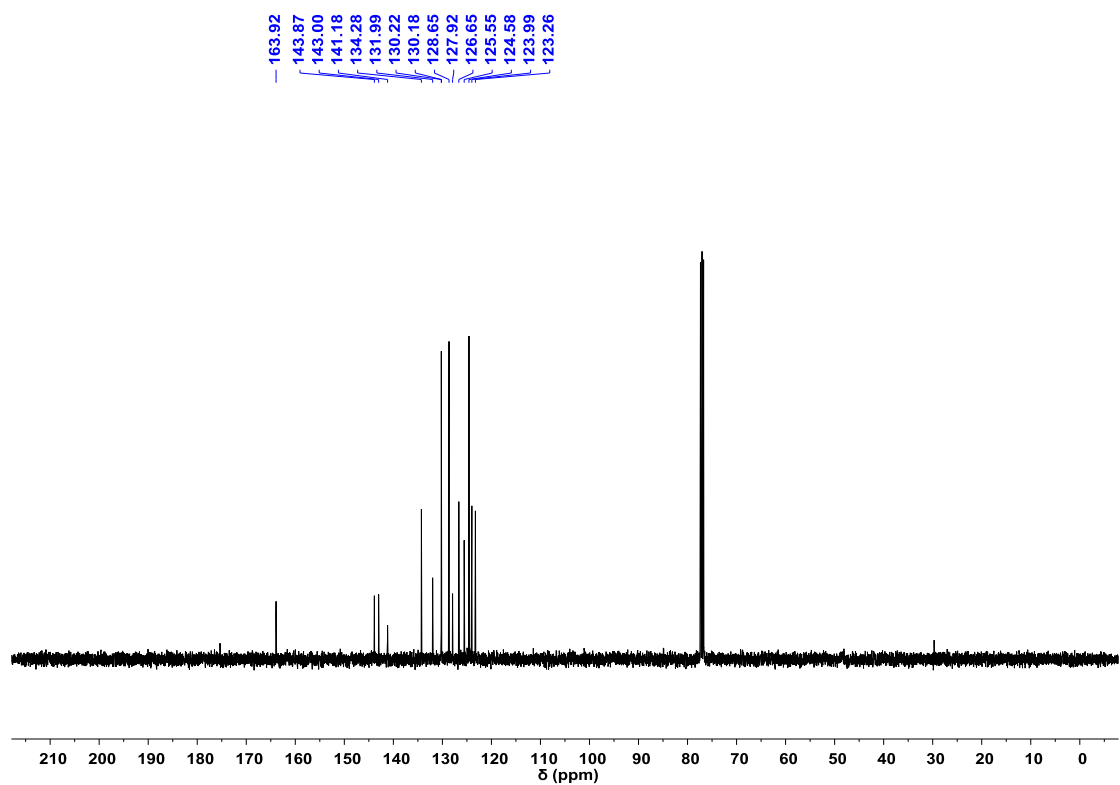

5-Bromo-2-((2,6-dichloro-4-nitrophenyl)amino)phenyl benzoate (**3dc**)

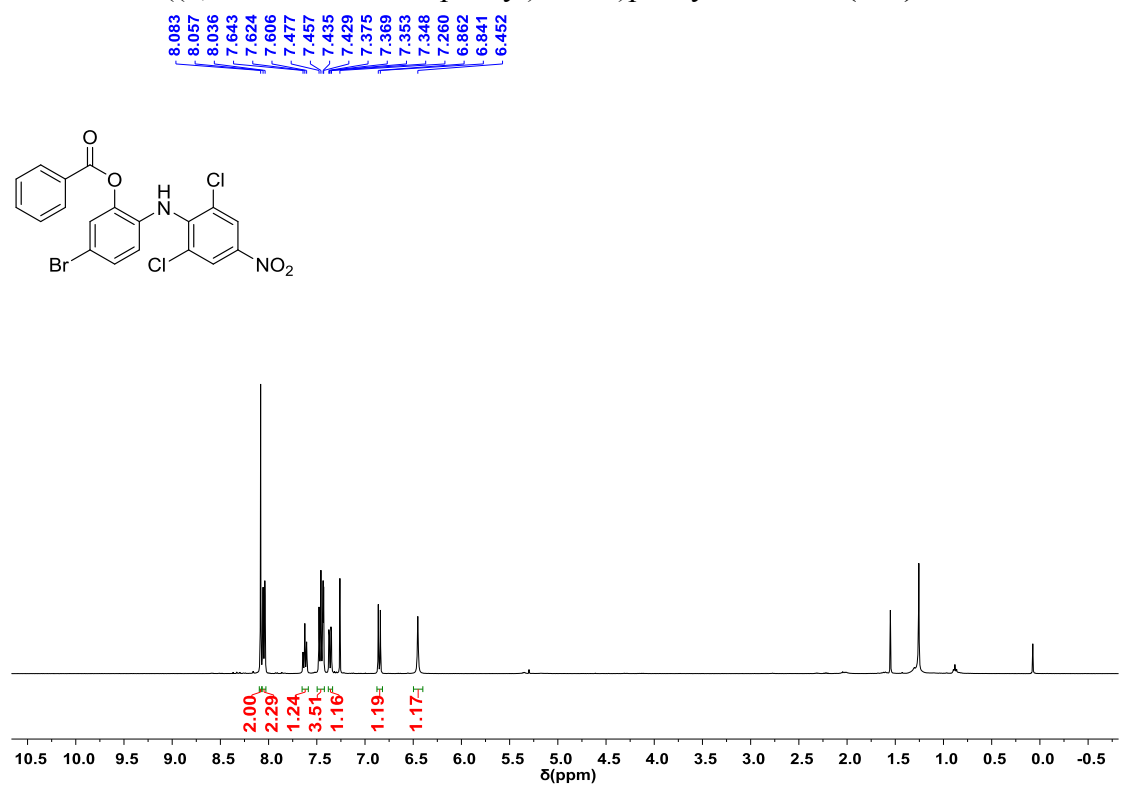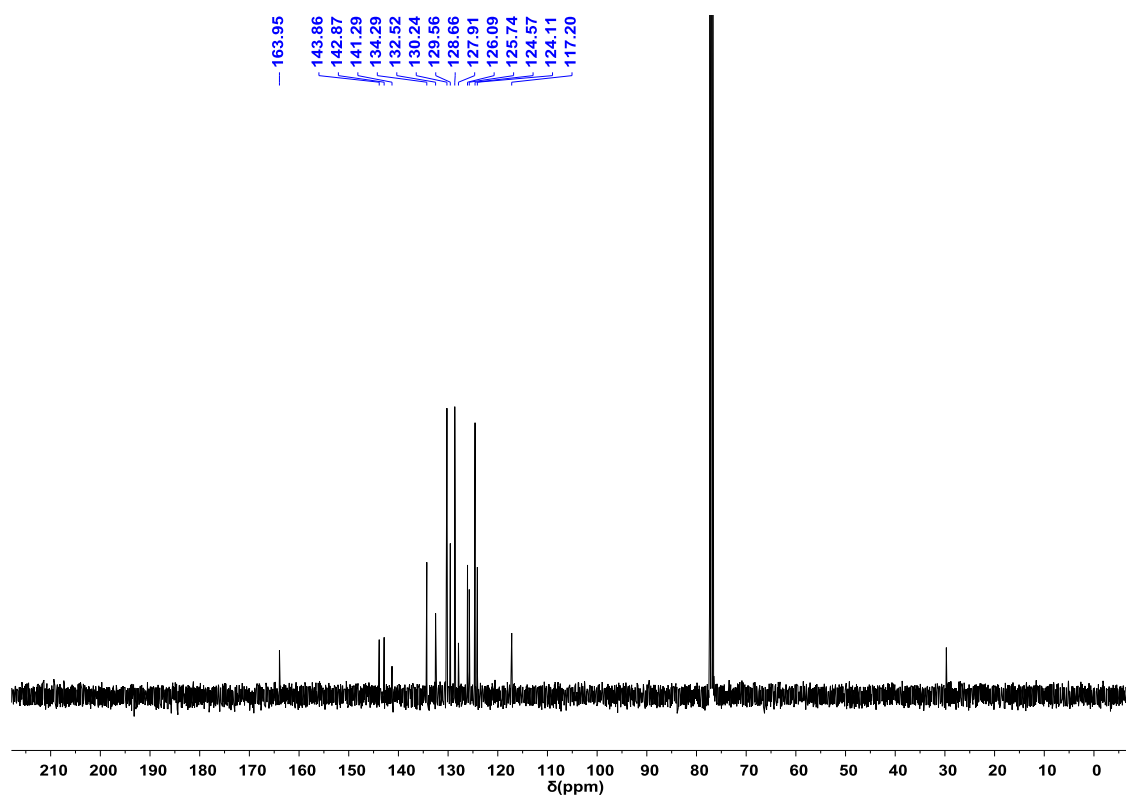

2-((2,6-Dichloro-4-nitrophenyl)amino)-5-methylphenyl acetate (**3ec**)

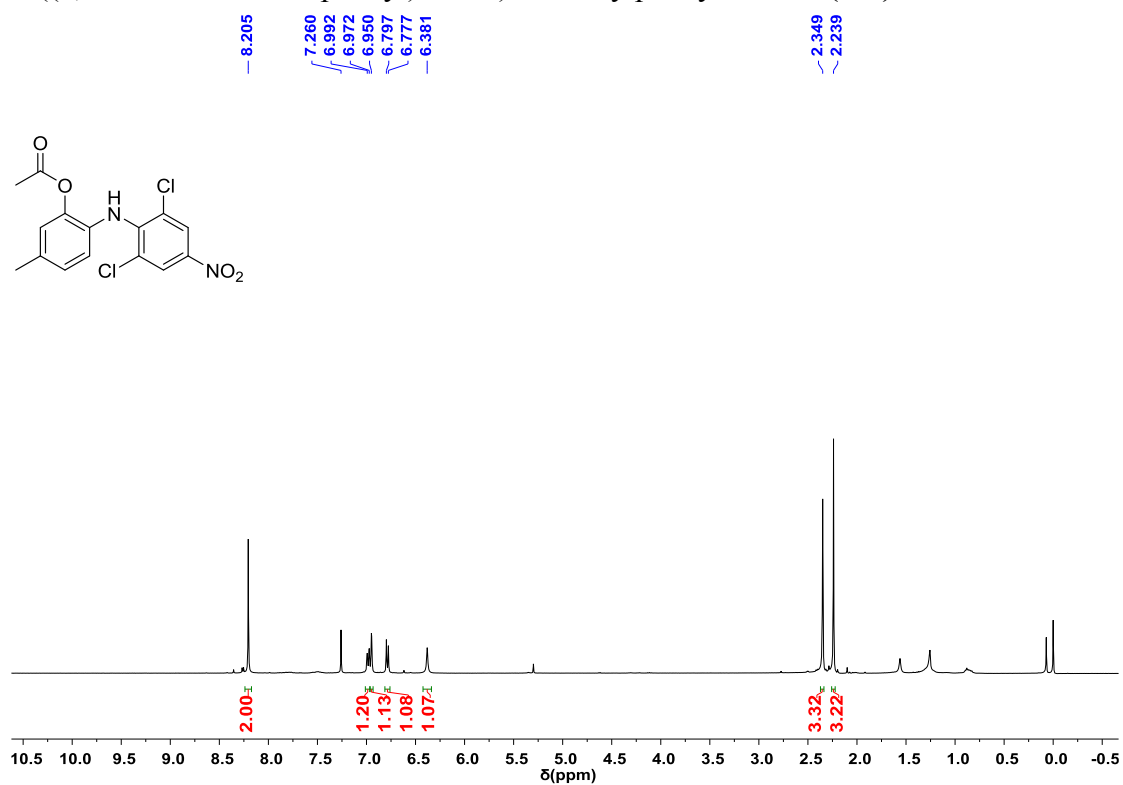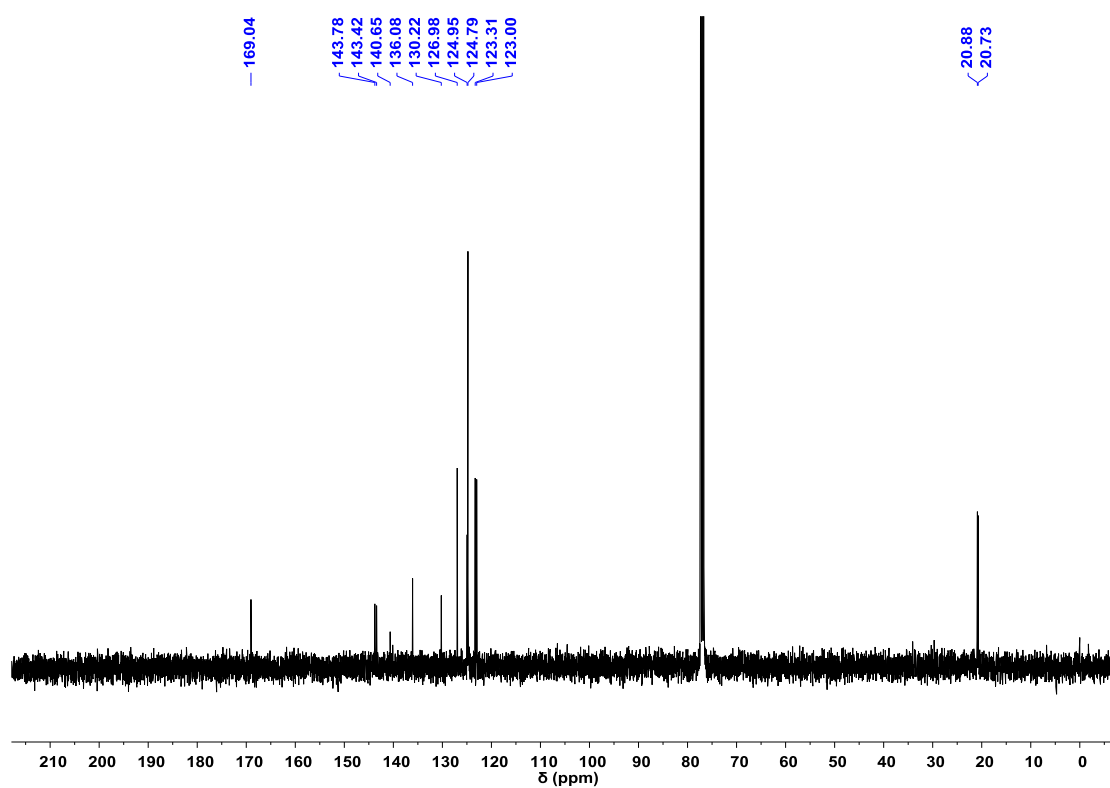



2-((2,6-Dichloro-4-nitrophenyl)amino)-5-methylphenyl 4-methylbenzoate (**3fc**)

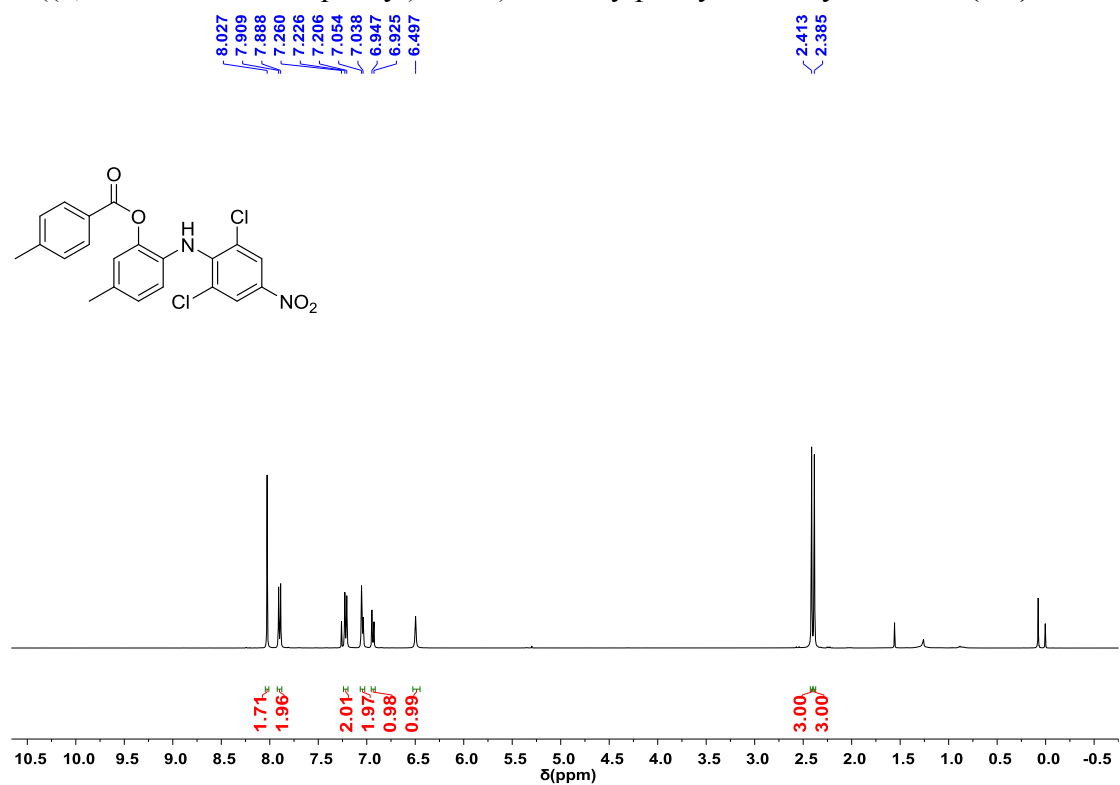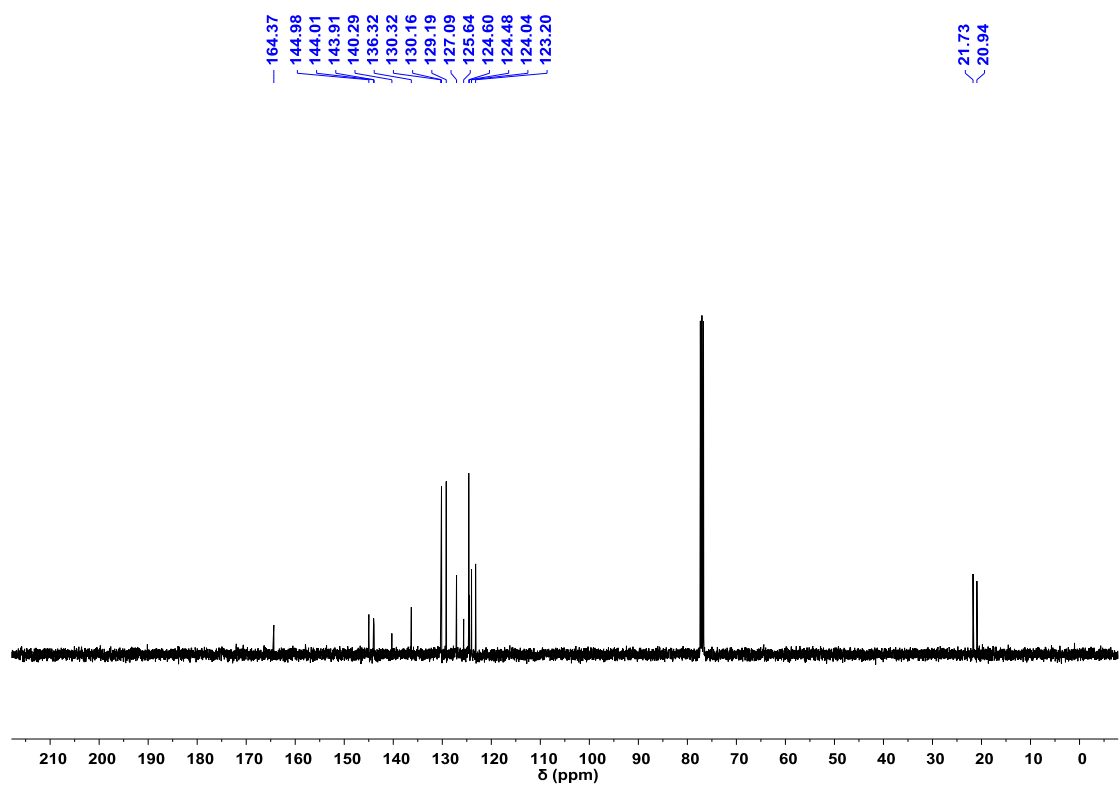

5-Chloro-2-((2,6-dichloro-4-nitrophenyl)amino)phenyl 3-chlorobenzoate (**3gc**)

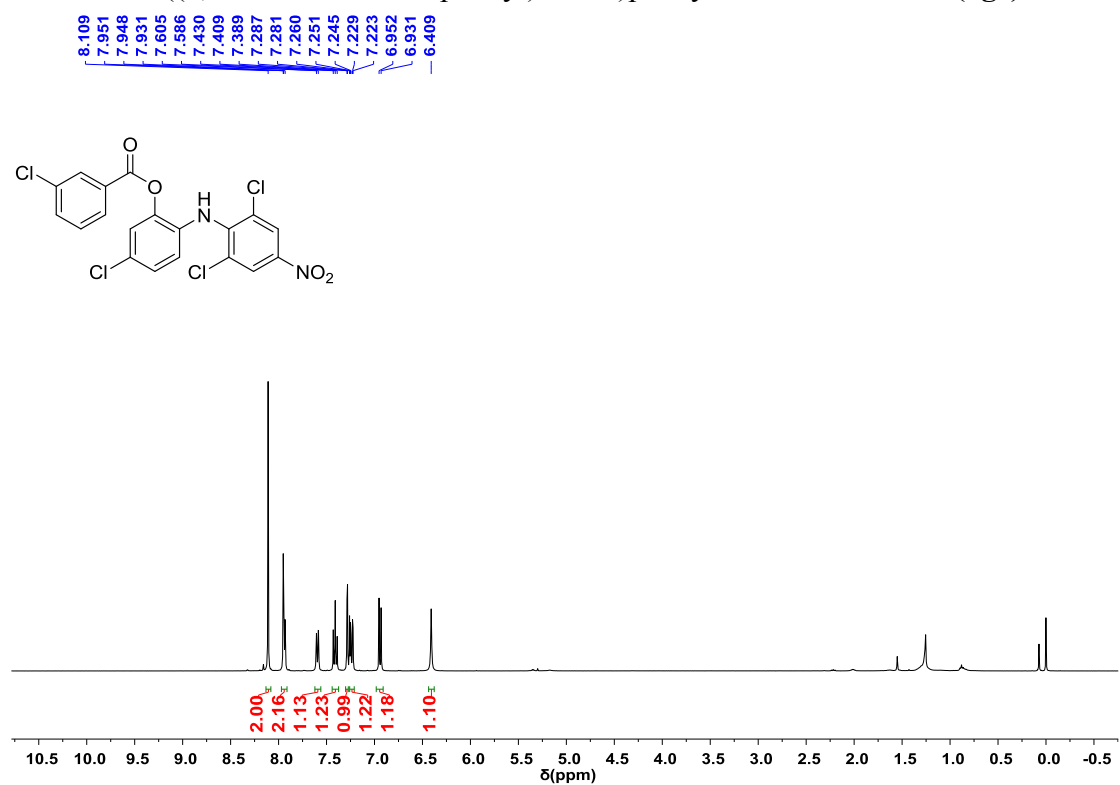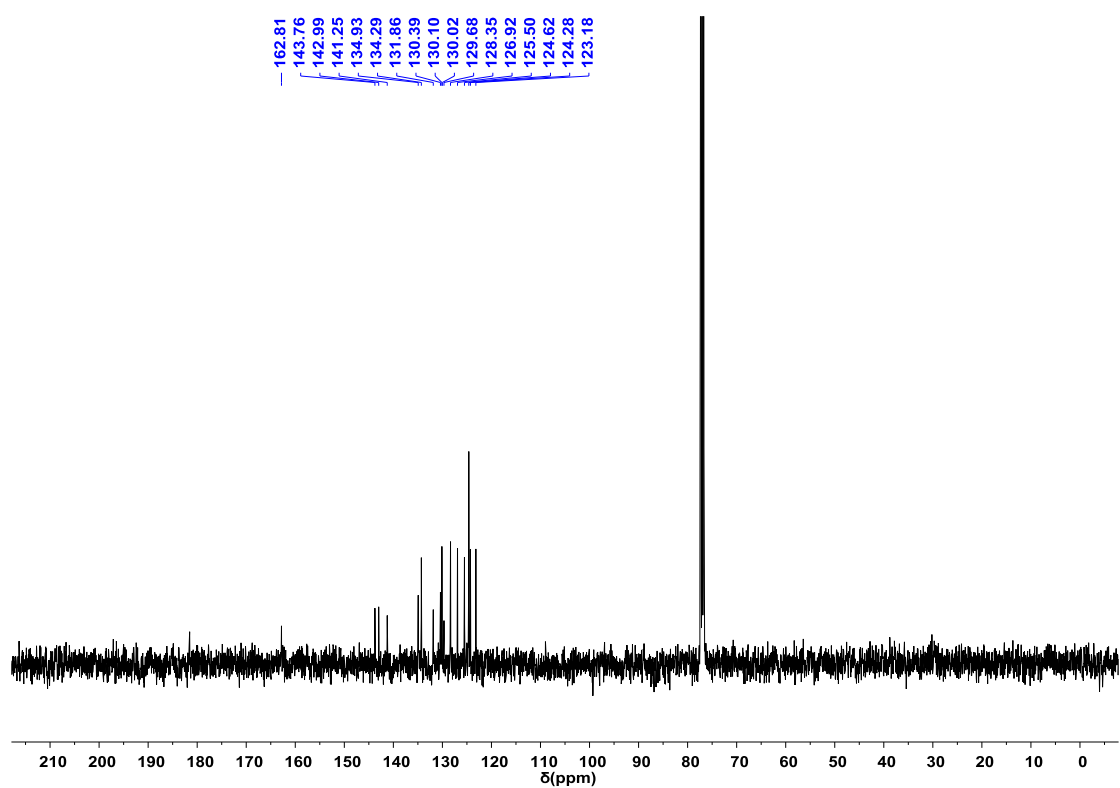

2-((2,6-Dichloro-4-nitrophenyl)amino)-5-methylphenyl 4-methoxybenzoate (**3hc**)

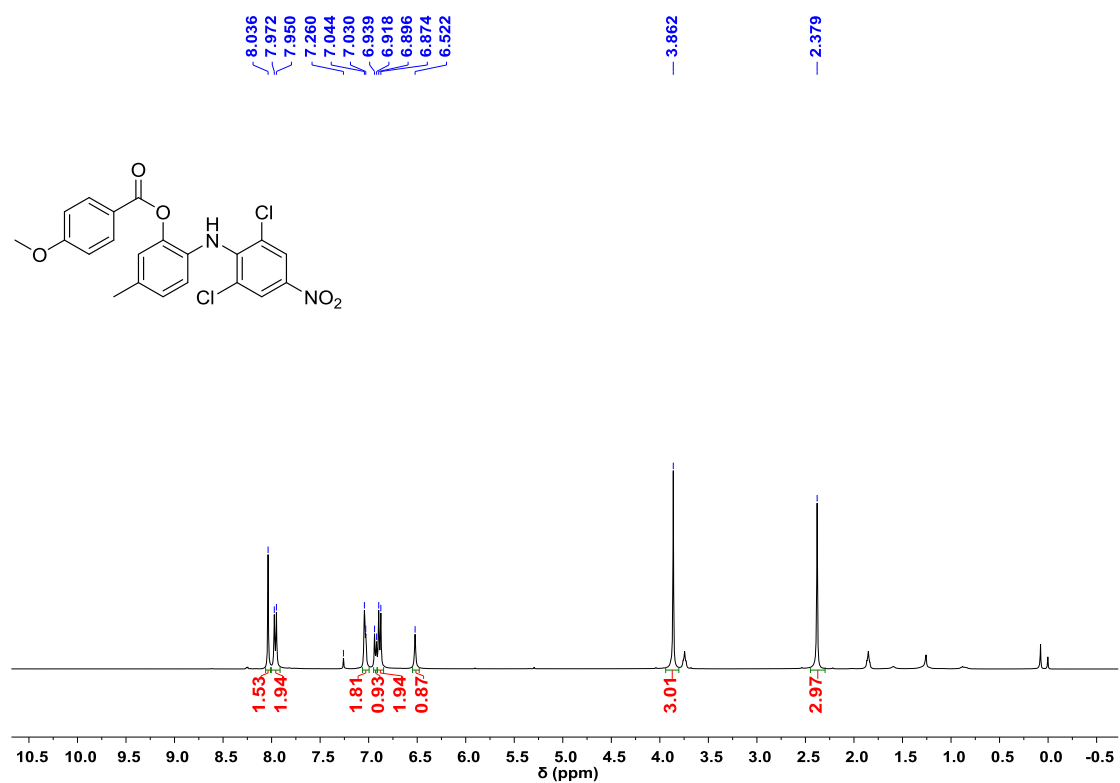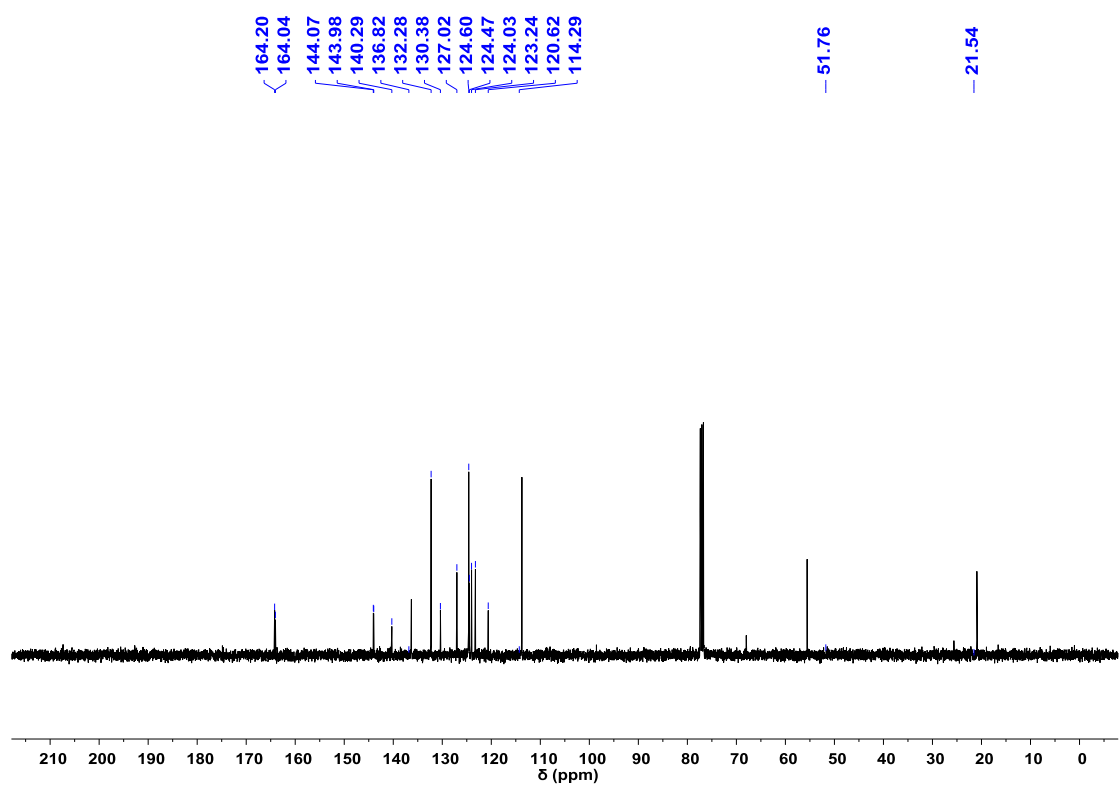

# Copies of $^1\text{H}$ and $^{13}\text{C}$ NMR spectra of product **4**

*N*-(2-(2,6-Dichloro-4-nitrophenoxy)-4-methylphenyl)-4-methylbenzamide (**4fc**)

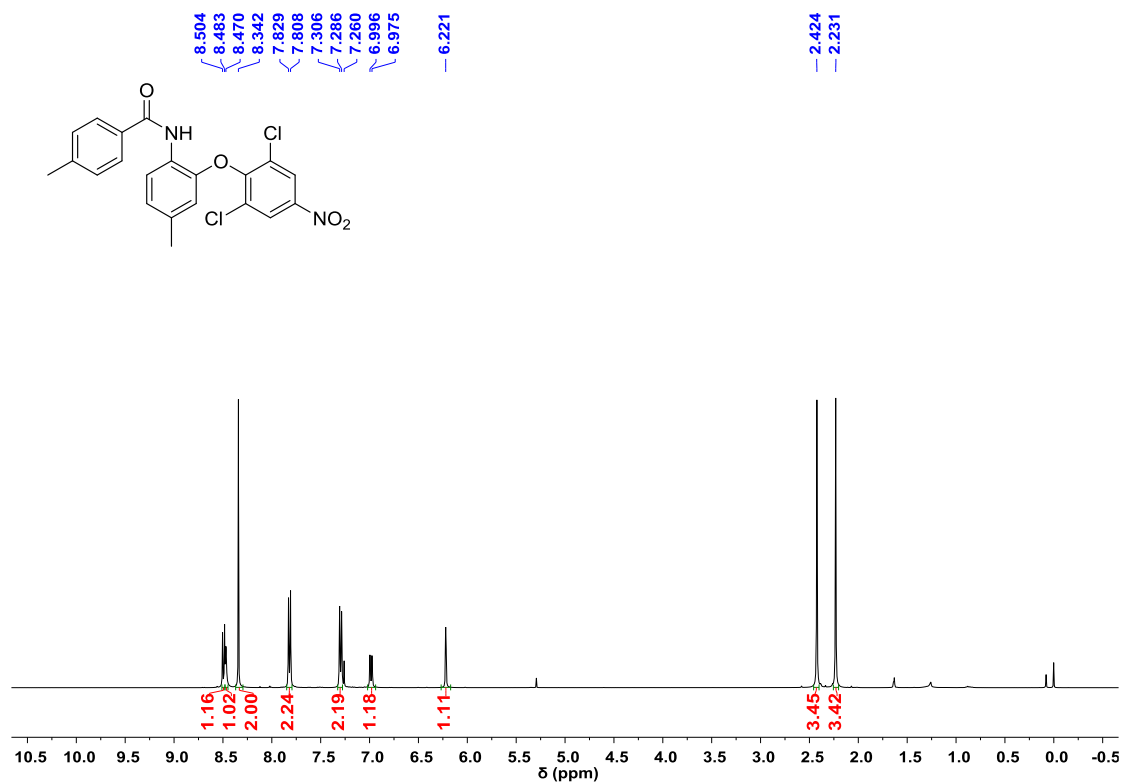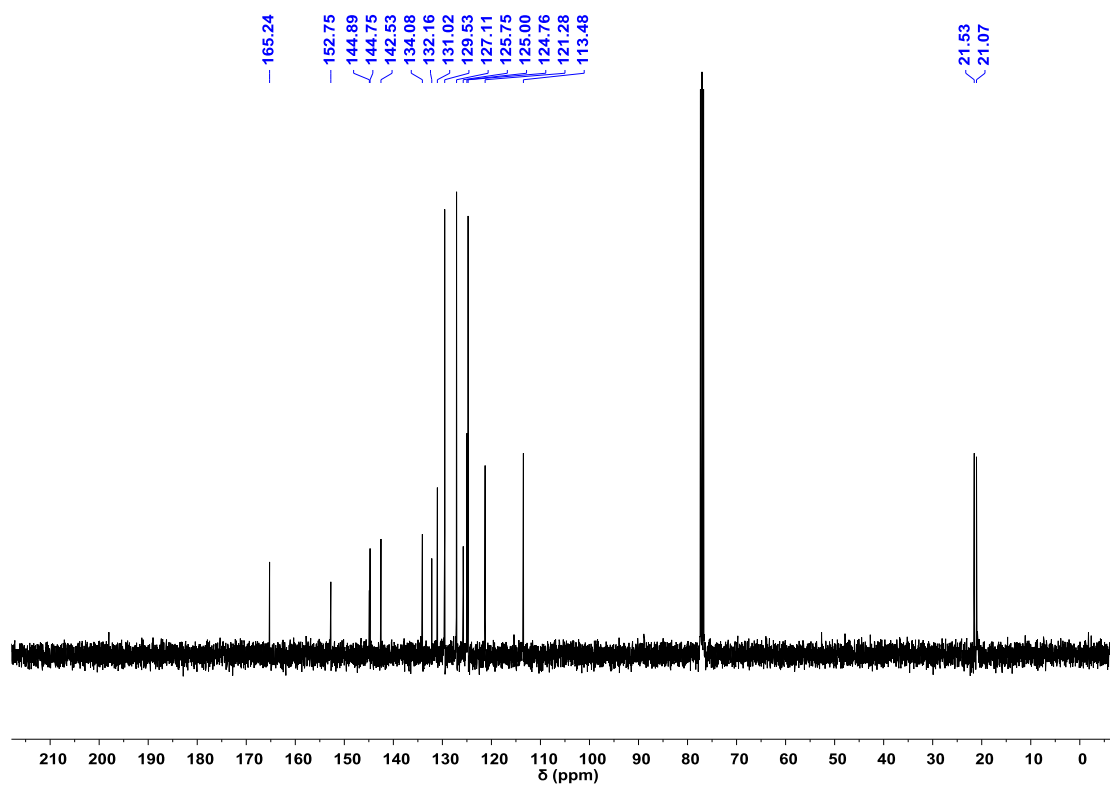

# Copies of $^1\text{H}$ and $^{13}\text{C}$ NMR spectra of product **5**

*N*-(2-Hydroxy-4-methylphenyl)benzamide (**5**)

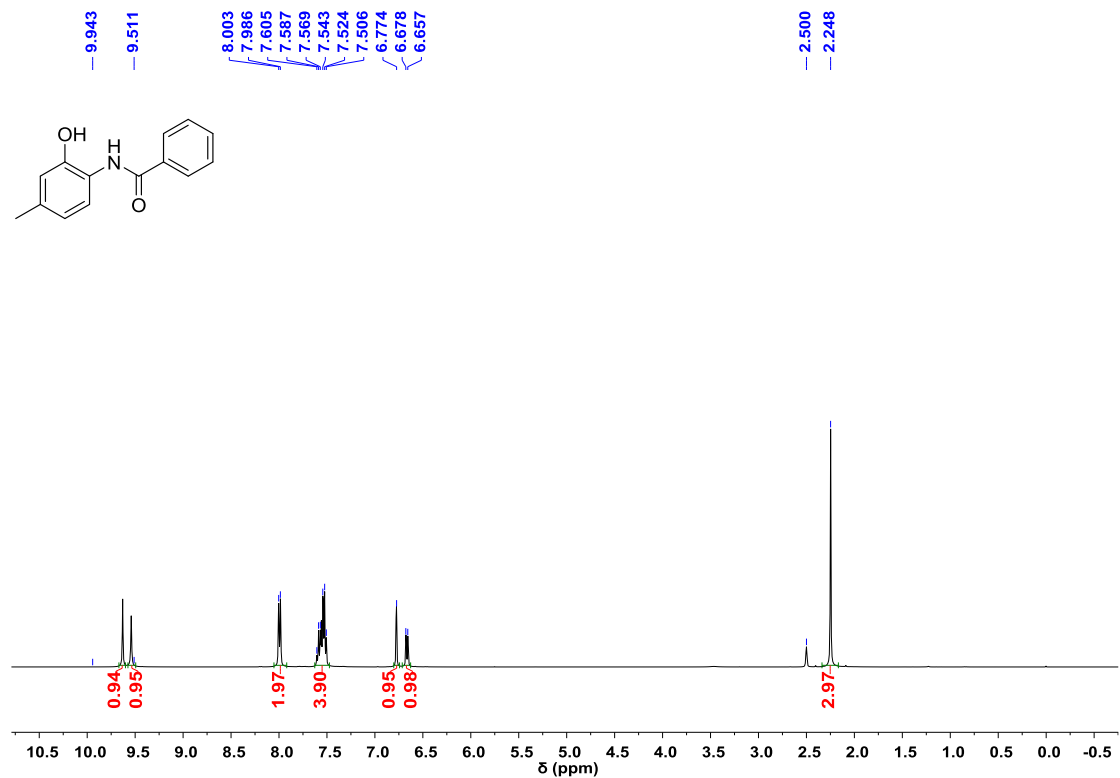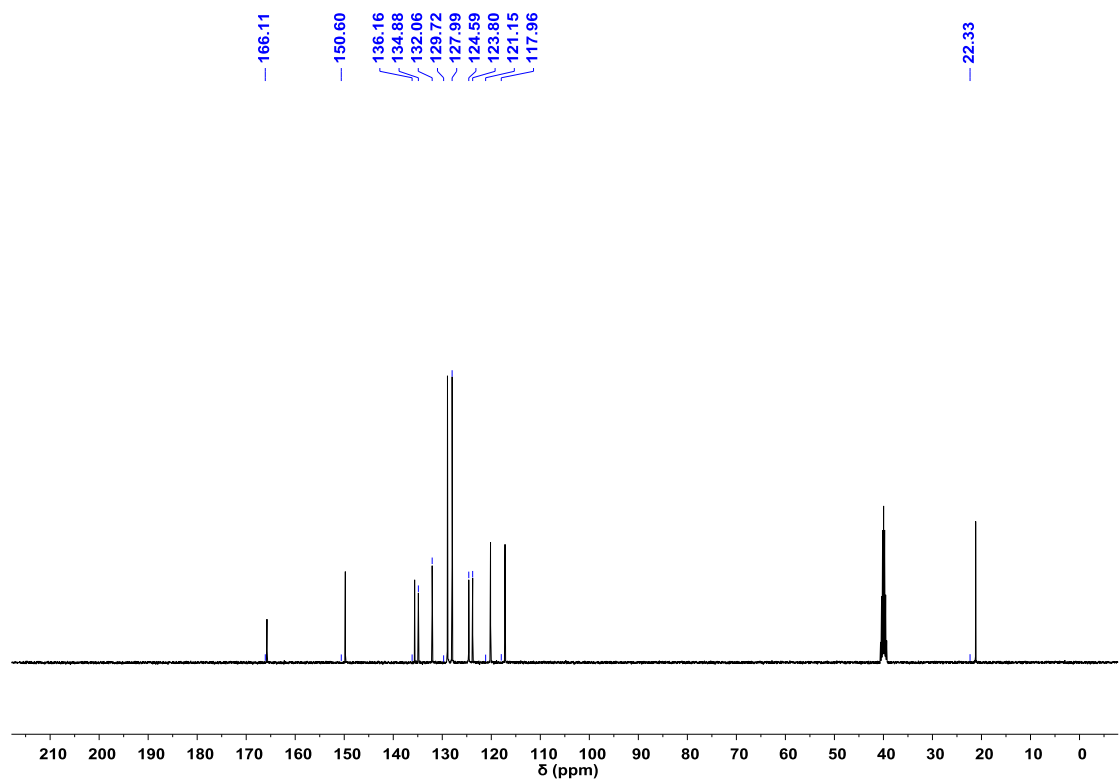

Copies of  $^1\text{H}$  NMR spectra of products **3** produced from the reactions of **5** and **2a,c**

**3ba** produced from the reactions of **1b** and **5** with **2a**

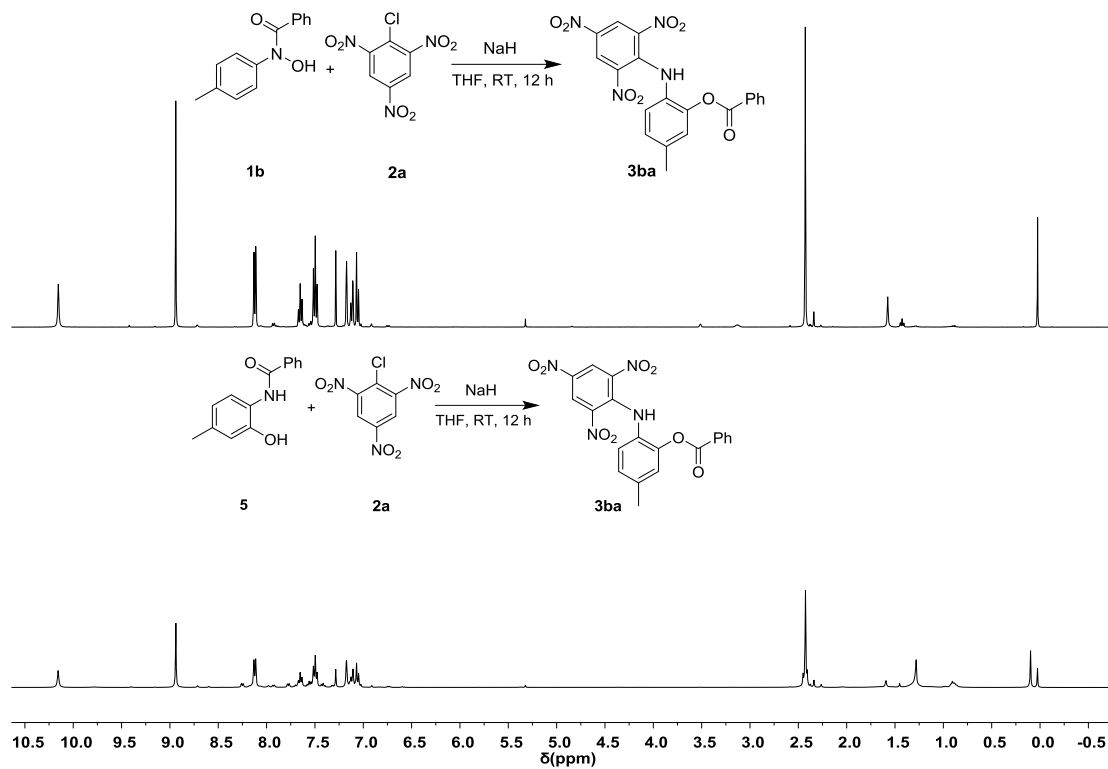

**3bc** produced from the reactions of **1b** and **5** with **2c**

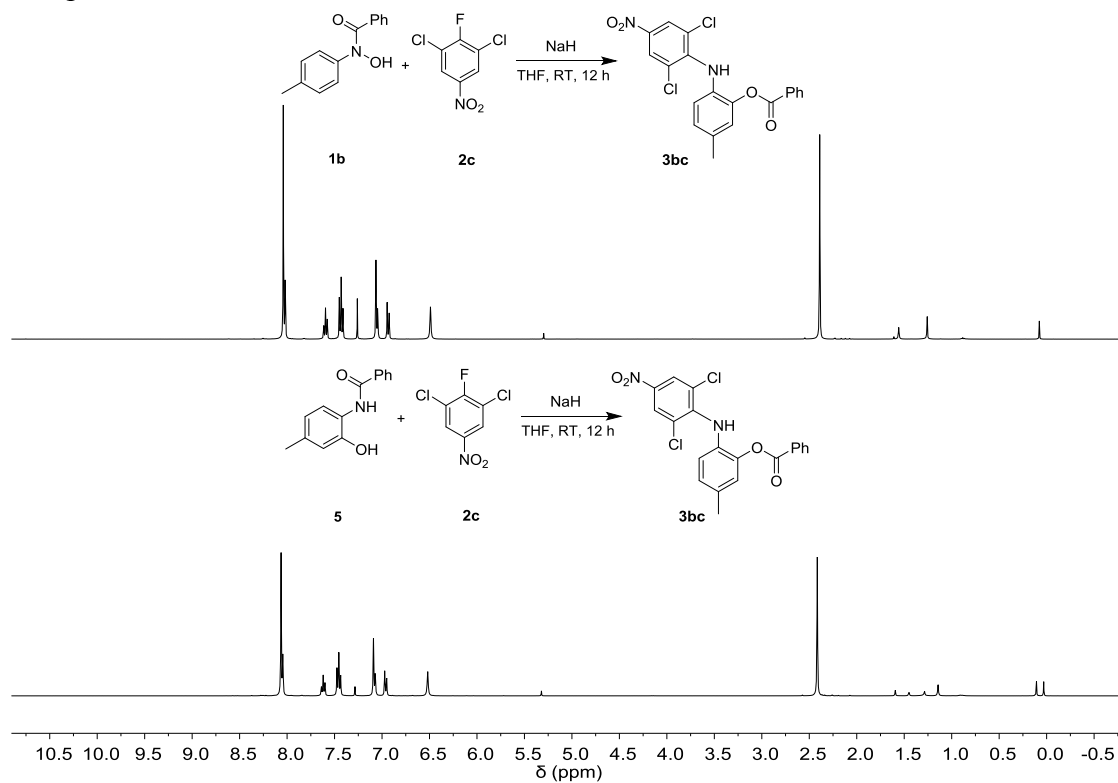

## Copies of $^1\text{H}$ NMR spectra in tracing reaction mixtures

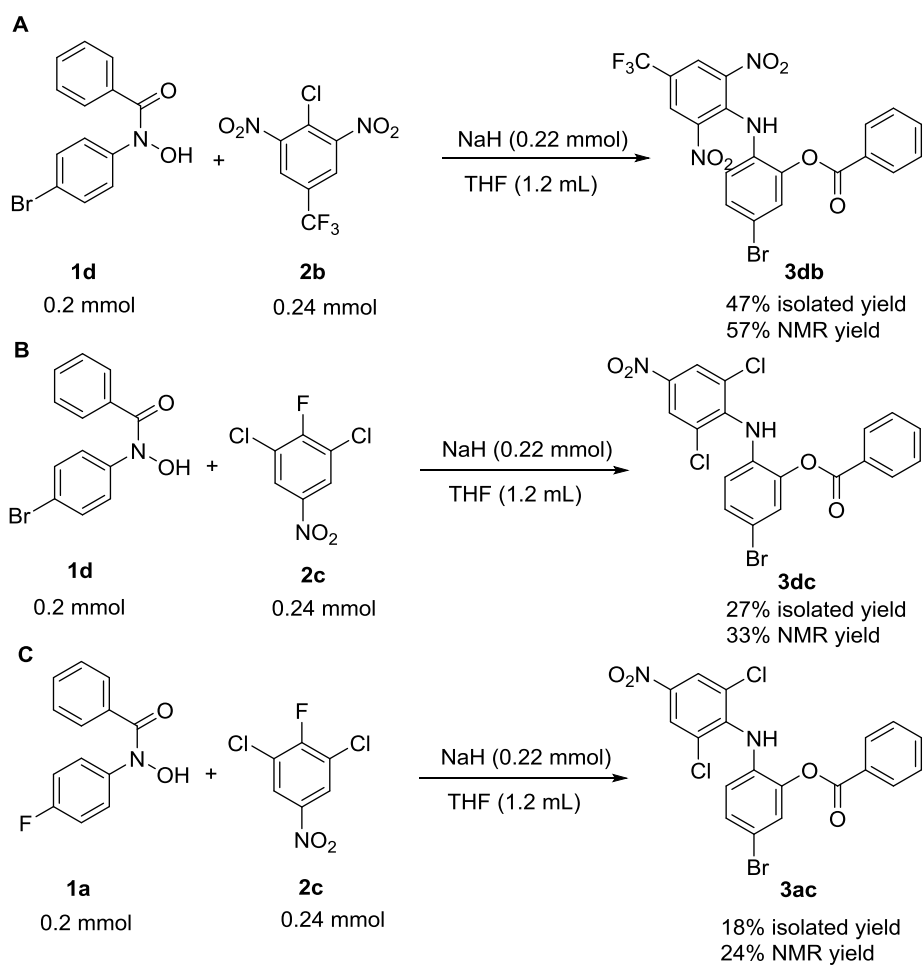

Scheme 1S.  $^1\text{H}$  NMR tracing reactions with NMR and isolated yields.

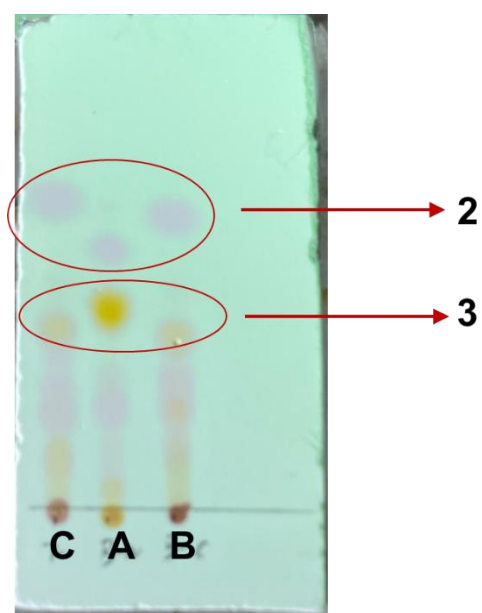

Figure 1S. TLC tracing results of reactions A, B, and C

Copies of  $^1\text{H}$  NMR spectra in tracing reaction mixture for reaction A  
**1d** (0.2 mmol) with 1,3,5-trimethoxybenzene (0.1 mmol) as an internal standard

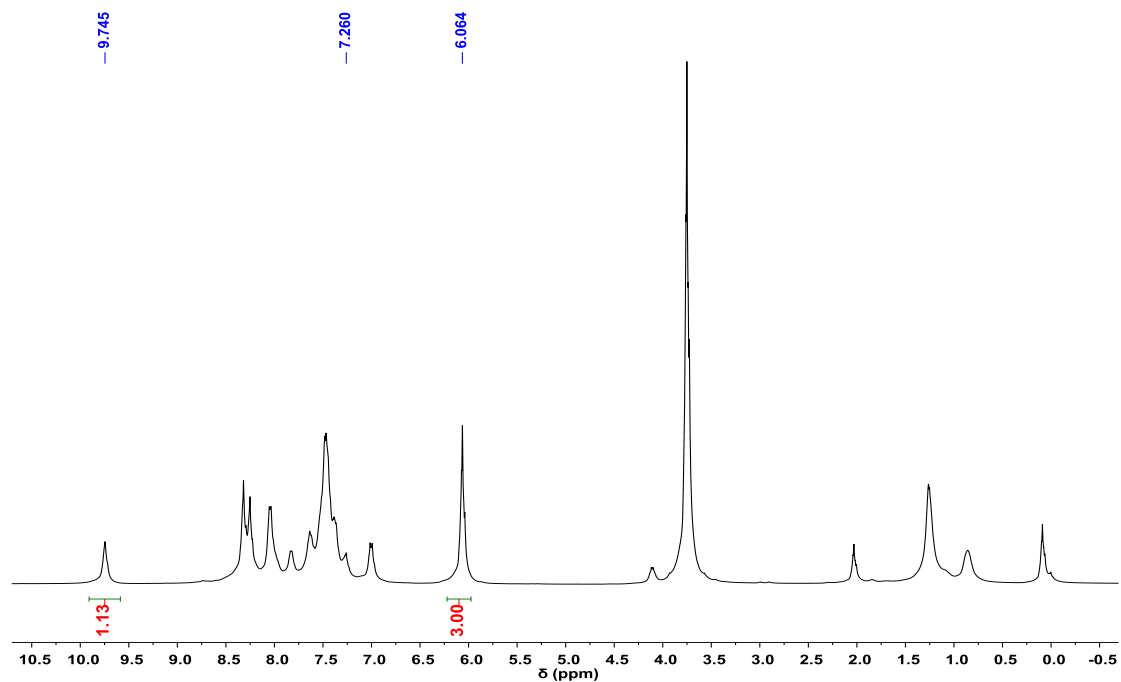

$^1\text{H}$  NMR spectrum of reaction mixture A

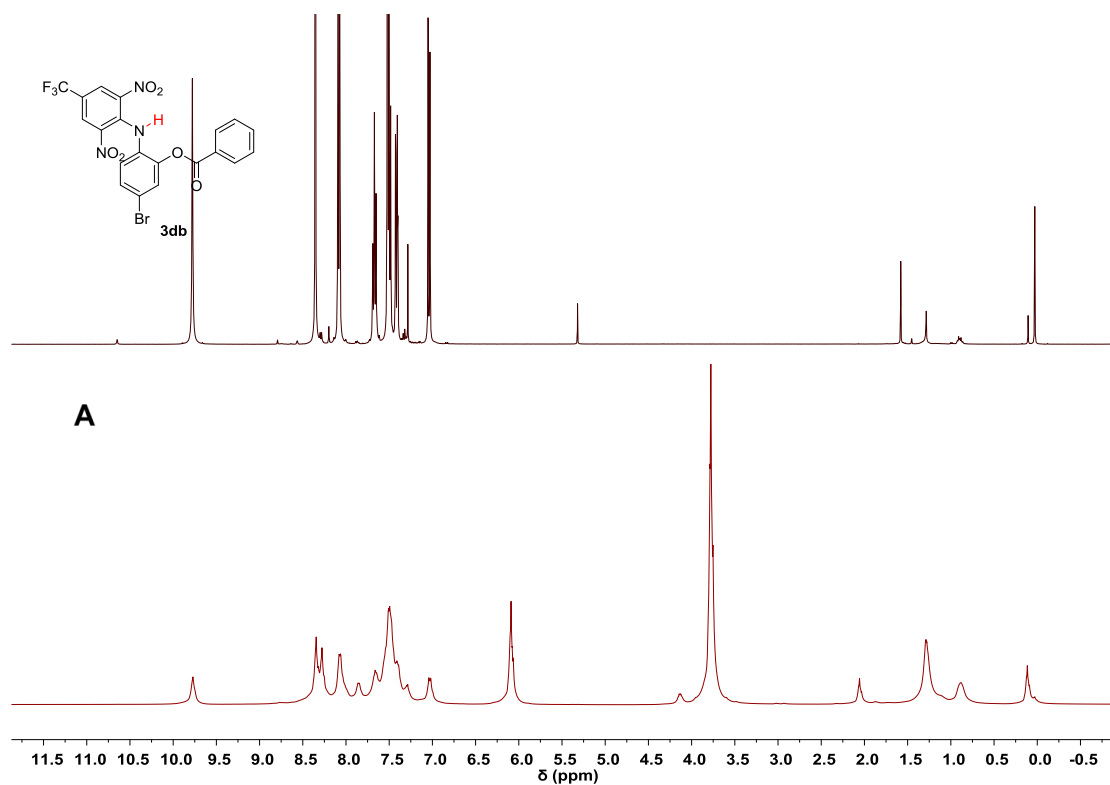

$^1\text{H}$  NMR spectra of product **3db** and reaction mixture A



Copies of  $^1\text{H}$  NMR spectra in tracing reaction mixture for reaction B

**1d** (0.2 mmol) with 1,3,5-trimethoxybenzene (0.1 mmol) as an internal standard

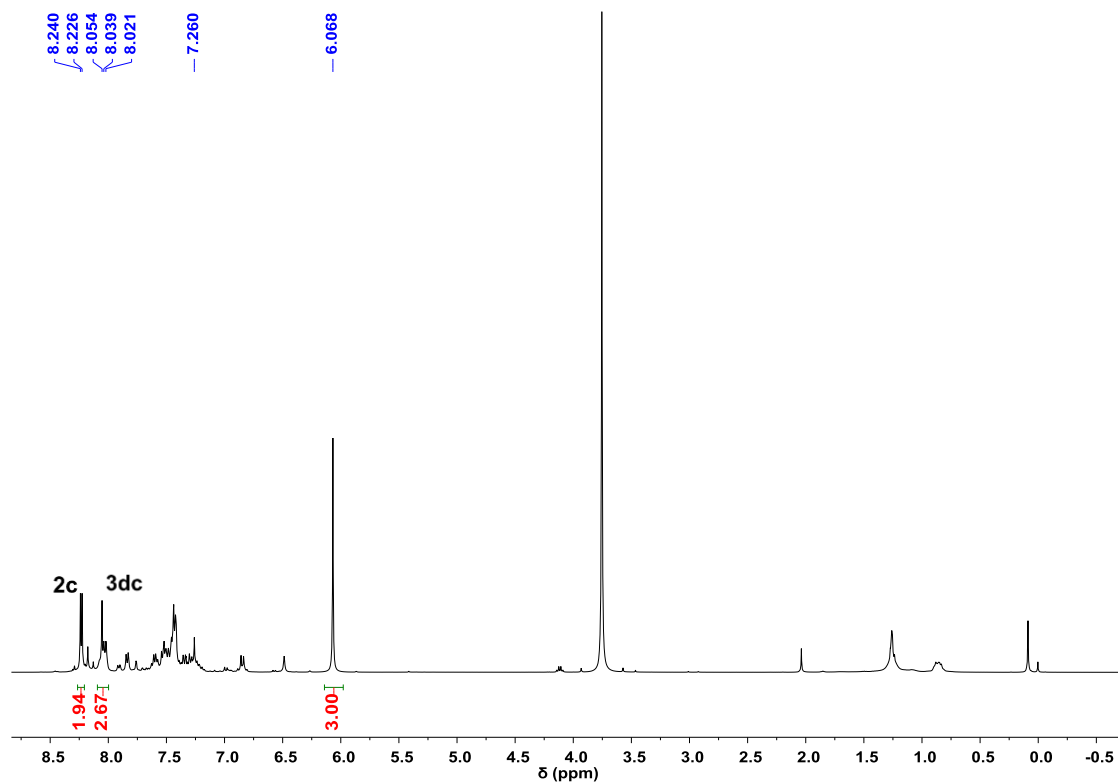

$^1\text{H}$  NMR spectrum of reaction mixture B

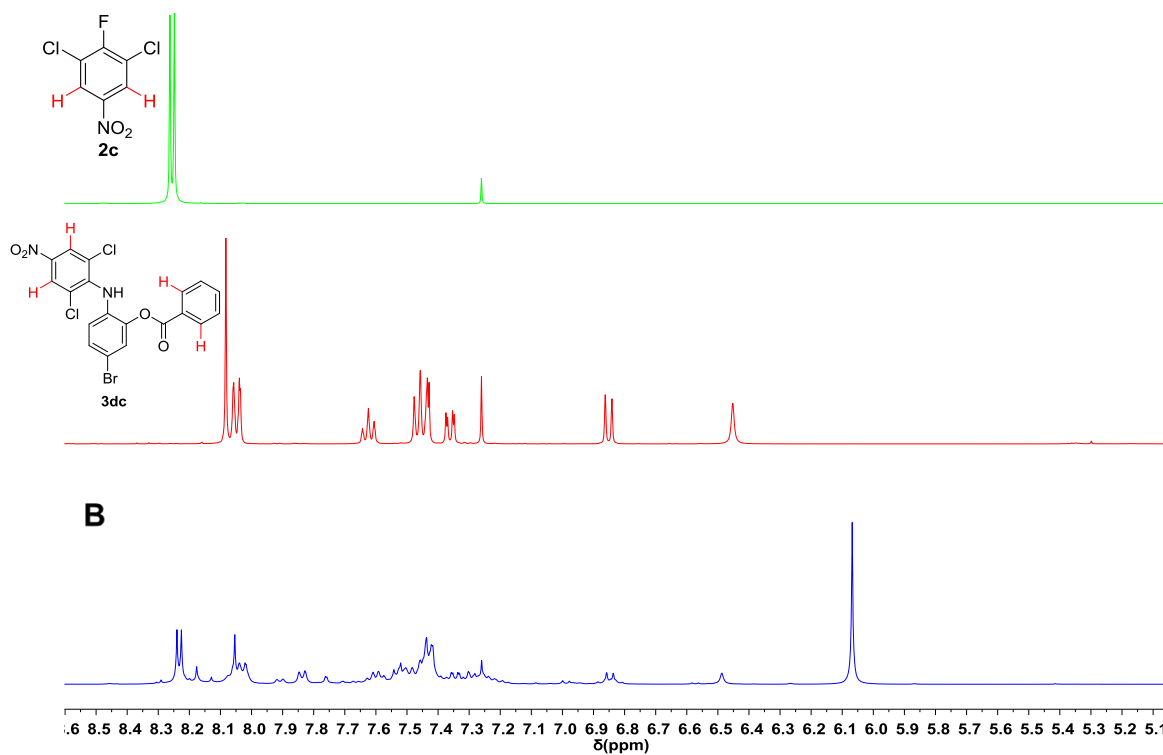

$^1\text{H}$  NMR spectra of reactant **2c**, product **3db** and reaction mixture B

Copies of  $^1\text{H}$  NMR spectra in tracing reaction mixture for reaction C

**1a** (0.2 mmol) with 1,3,5-trimethoxybenzene (0.1 mmol) as an internal standard

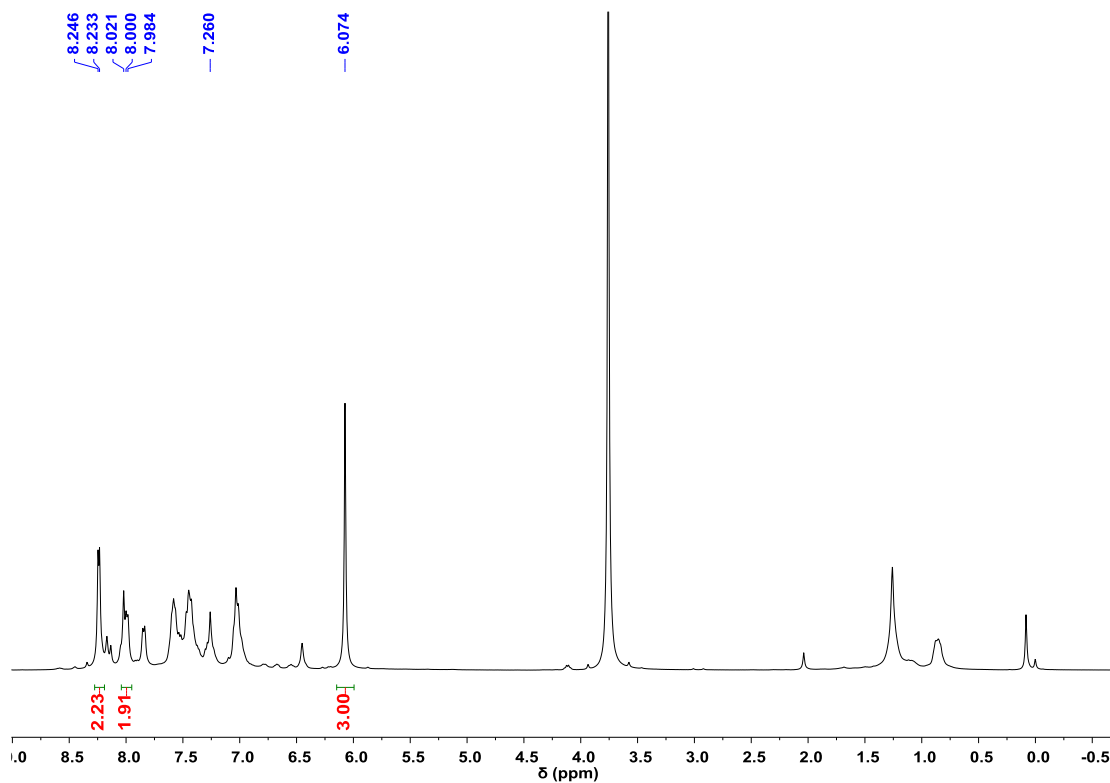

$^1\text{H}$  NMR spectrum of reaction mixture C

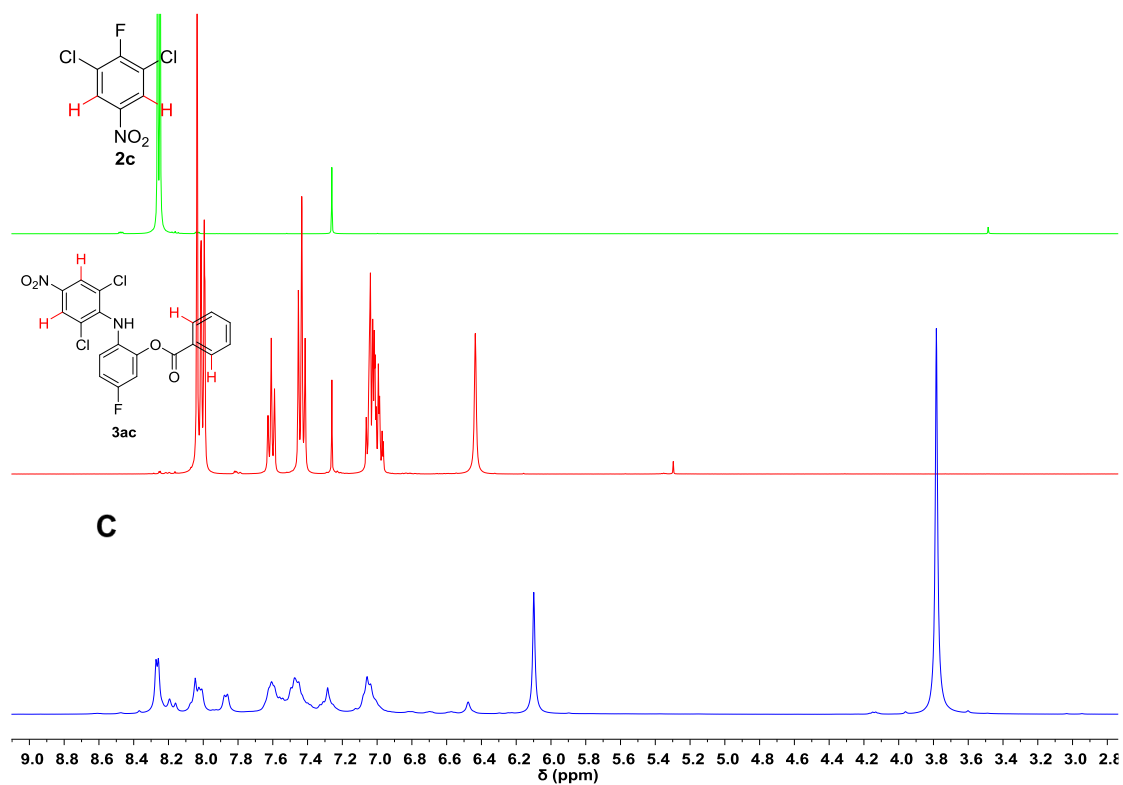

$^1\text{H}$  NMR spectra of reactant **2c**, product **3ac** and reaction mixture C
